# Supplementary material for: Label-free quantitative identification of abnormally ubiquitinated proteins as useful biomarkers for human lung squamous cell carcinomas
Source: PubMed Central journal article supplement (PMC7028901; doi:10.1007/s13167-019-00197-8), 2020-01-04
Supplement: 13167_2019_197_MOESM3_ESM.pdf [file 13167_2019_197_MOESM3_ESM.pdf]

Supplemental Table 1. Ubiquitinated proteins identified in LSCCs relative to controls. Ratio (T/N) =Ration of tumors(T) to controls(N). K\* = Ubiquitinated lysine residue.

| Accession No. | Gene name | Protein name                                                                         | Modifided peptides             | Modifided positions | Modifided probabilitie | Modified level (T) | Modified level (N) | Ratio (T/N) | t test p value |
|---------------|-----------|--------------------------------------------------------------------------------------|--------------------------------|---------------------|------------------------|--------------------|--------------------|-------------|----------------|
| A0A024QZA8    | EPHA2     | EPH receptor A2, isoform CRA_a                                                       | QK*VIGAGEFGEVYK                | 617                 | 1                      | 3130600            |                    |             |                |
| A0A024QZJ4    | MYH11     | Myosin, heavy polypeptide 11, smooth muscle, isoform CRA_a                           | LFTK*VKPLLQVTR                 | 840                 | 1                      | 20753333           |                    |             |                |
| A0A024QZN9    | VDAC2     | Voltage-dependent anion channel 2, isoform CRA_a                                     | LTFDITTFSPNTGKK*               | 146                 | 0.536                  | 2601933            |                    |             |                |
| A0A024QZP6    | H2AFY2    | Core histone macro-H2A                                                               | GK*SETILSPPPEKR                | 123                 | 1                      | 13477667           |                    |             |                |
| A0A024R056    | GNB1      | Guanine nucleotide binding protein (G protein), beta polypeptide 1, isoform CRA_a    | K*ACADATLSQITNNIDPVG<br>R      | 23                  | 1                      | 3532333            | 23399000           | 0.15        | 7.85E-04       |
| A0A024R0H1    | SLC16A1   | Solute carrier family 16 (Monocarboxylic acid transporters), member 1, isoform CRA_b | EEETSIDVAGKPNEVTK*AA<br>ESPDQK | 479                 | 0.999                  | 5299400            |                    |             |                |
| A0A024R0S6    | EHD2      | EH-domain containing 2, isoform CRA_a                                                | TVTSALK*ELYR                   | 26                  | 1                      | 3048250            | 64938667           | 0.05        | 3.93E-05       |
| A0A024R0Z5    | TEGT      | Testis enhanced gene transcript (BAX inhibitor 1), isoform CRA_a                     | K*INFDALLK                     | 7                   | 1                      | 21429000           | 2414167            | 8.88        | 3.43E-02       |
| A0A024R1N1    | MYH9      | Myosin, heavy polypeptide 9, non-muscle, isoform CRA_a                               | K*AGKLDPHLVLDQLR               | 679                 | 0.69                   | 13710333           |                    |             |                |
|               |           |                                                                                      | VAAYDKLEKTK*                   | 1413                | 0.875                  | 11818400           |                    |             |                |
|               |           |                                                                                      | VK*PLLQVSR                     | 835                 | 1                      | 16890667           | 3130050            | 5.40        | 3.40E-03       |

|            |        |                                                                                                               |                            |     |       |           |          |      |          |
|------------|--------|---------------------------------------------------------------------------------------------------------------|----------------------------|-----|-------|-----------|----------|------|----------|
| A0A024R1N4 | XRCC6  | X-ray repair complementing defective repair in Chinese hamster cells 6 (Ku autoantigen, 70kDa), isoform CRA_a | TFNTSTGGLLLPSDTK*R         | 317 | 1     | 4542650   |          |      |          |
| A0A024R1P2 | RAC2   | Ras-related C3 botulinum toxin substrate 2 (Rho family, small GTP binding protein Rac2), isoform CRA_a        | LAPITYPQGLALAK*EIDSVK      | 147 | 0.944 | 2985667   |          |      |          |
| A0A024R1T2 | KRTHA5 | Keratin, hair, acidic, 5, isoform CRA_a                                                                       | TIEELQK*                   | 156 | 1     | 239730000 |          |      |          |
| A0A024R1X8 | JUP    | Junction plakoglobin, isoform CRA_a                                                                           | LLNQPNQWPLVK*ATIGLIR       | 499 | 1     | 3576867   |          |      |          |
|            |        |                                                                                                               | NLSDVATK*QEGLESVLK         | 385 | 1     | 3988100   |          |      |          |
| A0A024R1Z6 | VAT1   | Vesicle amine transport protein 1 homolog (T californica), isoform CRA_a                                      | ISPK*GVDIVMDPLGGSDTA<br>K  | 255 | 1     | 25786667  | 60146333 | 0.43 | 3.79E-03 |
| A0A024R210 | IFITM1 | Interferon induced transmembrane protein 1 (9-27), isoform CRA_a                                              | MHK*EEHEVAVLGAPPSTIL<br>PR | 3   | 1     | 40647000  | 4662833  | 8.72 | 1.48E-03 |
| A0A024R244 | SYK    | Tyrosine-protein kinase                                                                                       | GSEVTAMLEK*GER             | 587 | 1     | 4398400   |          |      |          |
|            |        |                                                                                                               | ISDFGLSK*ALR               | 517 | 1     | 8890667   |          |      |          |
| A0A024R2M8 | XPC    | Xeroderma pigmentosum, complementation group C, isoform CRA_a                                                 | SLLPVK*PVEIEIETPEQAK       | 161 | 1     |           | 3078000  |      |          |
| A0A024R324 | RHOA   | Ras homolog gene family, member A, isoform CRA_a                                                              | HFCPNVPIILVGNKK*           | 119 | 0.9   | 8406367   |          |      |          |
|            |        |                                                                                                               | MK*QEPVKPEEGR              | 135 | 1     | 4368350   | 13454600 | 0.32 | 4.59E-02 |

|            |               |                                             |                       |     |       |          |          |      |          |
|------------|---------------|---------------------------------------------|-----------------------|-----|-------|----------|----------|------|----------|
| A0A024R3E3 | APOA1         | Apolipoprotein A-I, isoform CRA_a           | DYVSQFEGSALGK*QLNLK   | 64  | 1     | 3406267  | 88441333 | 0.04 | 1.62E-03 |
|            |               |                                             | VQPYLDDFQKK*          | 131 | 0.563 |          | 12304133 |      |          |
|            |               |                                             | VSFLSALEEYTKK*        | 263 | 0.5   |          | 4042000  |      |          |
|            |               |                                             | VSFLSALEEYTK*K        | 262 | 0.629 |          | 5436200  |      |          |
| A0A024R3V8 | TSNAX         | Translin-associated factor X, isoform CRA_c | TPSSDAQDK*QFGTWR      | 173 | 1     | 10708567 |          |      |          |
| A0A024R4E2 | TARDBP        | TAR DNA binding protein, isoform CRA_b      | AVQK*TSDLIVLGLPWK     | 102 | 1     | 4941167  |          |      |          |
|            |               |                                             | LPNSK*QSQDEPLR        | 181 | 1     | 5747050  |          |      |          |
|            |               |                                             | WCDCK*LPNSK           | 176 | 1     | 2462500  |          |      |          |
| A0A024R4F1 | ENO1          | Enolase 1, (Alpha), isoform CRA_a           | K*LVNTEQEK            | 81  | 1     | 3367000  |          |      |          |
| A0A024R4S1 | EPN1          | Epsin 1, isoform CRA_a                      | ENMYAVQTLK*DFQYVDR    | 107 | 1     | 5460700  | 29727000 | 0.18 | 9.53E-05 |
| A0A024R4Y2 | hCG_3976<br>2 | HCG39762, isoform CRA_c                     | EFLSAK*EETPGAGQK      | 255 | 1     | 3591833  | 10746633 | 0.33 | 2.14E-03 |
|            |               |                                             | ELQSK*EFLSAK          | 249 | 1     |          | 13918033 |      |          |
| A0A024R539 | LOC51035      | Uncharacterized protein                     | MLELVAQK*QR           | 105 | 1     | 31278667 | 7629233  | 4.10 | 1.12E-02 |
| A0A024R546 | ZDHHC5        | Palmitoyltransferase                        | TVEIK*GIQVR           | 97  | 1     | 1833067  |          |      |          |
| A0A024R5Z7 | ANXA2         | Annexin                                     | ASMK*GLGTDEDSLIEIICSR | 119 | 1     | 4649550  | 33281333 | 0.14 | 4.89E-03 |

|            |         |                                                                         |                                     |     |       |           |           |       |          |
|------------|---------|-------------------------------------------------------------------------|-------------------------------------|-----|-------|-----------|-----------|-------|----------|
|            |         |                                                                         | DLYDAGVK*R                          | 204 | 1     | 8685800   | 46219667  | 0.19  | 5.56E-03 |
|            |         |                                                                         | TK*GVDEVTIVNILTNR                   | 49  | 1     | 18385667  | 43711000  | 0.42  | 1.31E-03 |
| A0A024R694 | ACTN1   | Actinin, alpha 1, isoform CRA_a                                         | VPENTMHAMQQK*LEDNR                  | 312 | 1     | 5869100   |           |       |          |
| A0A024R6N1 | TRAF3   | TNF receptor-associated factor 3, isoform CRA_a                         | VTELESVDK*SAGQVAR                   | 369 | 1     | 2203333   |           |       |          |
| A0A024R757 | CAV1    | Caveolin                                                                | ADELSEK*QVYDAHTK                    | 8   | 1     | 40507000  | 275663333 | 0.15  | 3.32E-03 |
|            |         |                                                                         | QVYDAHTK*EIDLVR                     | 16  | 1     | 17464667  | 87394667  | 0.20  | 1.68E-02 |
| A0A024R7C7 | ILF3    | Interleukin enhancer binding factor 3, 90kDa, isoform CRA_d             | GWPLELLCEK*SIGTANRP<br>MGAGEALR     | 257 | 1     | 6463233   |           |       |          |
| A0A024R7G8 | RAD23A  | RAD23 homolog A (S. cerevisiae), isoform CRA_a                          | EDK*SPSEESAPTTSPESV<br>SGSVPSSGSSGR | 122 | 1     |           | 13101500  |       |          |
|            |         |                                                                         | LIYAGK*ILSDDVPIRDYR                 | 53  | 1     | 119434000 | 261560000 | 0.46  | 6.28E-03 |
| A0A024R7T3 | HNRPF   | Heterogeneous nuclear ribonucleoprotein F, isoform CRA_a                | YIGIVK*QAGLER                       | 224 | 1     | 15064600  |           |       |          |
| A0A024R816 | TTYH3   | Protein tweety homolog                                                  | AK*YLATSQPRPDSSGSH                  | 508 | 1     | 10262267  |           |       |          |
| A0A024R870 | LRSAM1  | Leucine rich repeat and sterile alpha motif containing 1, isoform CRA_a | WALSSLLQQLLKEK*                     | 522 | 0.646 | 2802300   | 242230    | 11.57 | 3.13E-03 |
| A0A024R8B8 | C9orf28 | Chromosome 9 open reading frame 28, isoform CRA_a                       | ENSHLGNVLVDMK*LIDIK                 | 115 | 0.999 | 3338433   |           |       |          |
| A0A024R8N2 | ITGB4   | Integrin beta                                                           | LCTENLLK*PDTR                       | 834 | 1     | 16216333  |           |       |          |

|            |         |                                                                                                  |                    |      |       |          |          |      |          |
|------------|---------|--------------------------------------------------------------------------------------------------|--------------------|------|-------|----------|----------|------|----------|
| A0A024R8U1 | SLC16A3 | Solute carrier family 16 (Monocarboxylic acid transporters), member 3, isoform CRA_a             | LHK*PPADSGVDLR     | 431  | 1     | 2378850  |          |      |          |
| A0A024R936 | NCF2    | Neutrophil cytosolic factor 2 (65kDa, chronic granulomatous disease, autosomal 2), isoform CRA_a | DLK*EALIQLR        | 95   | 1     | 7897267  |          |      |          |
|            |         |                                                                                                  | QK*LYEPVVIPVGR     | 170  | 1     | 4964267  |          |      |          |
| A0A024R968 | ATP2B4  | Calcium-transporting ATPase                                                                      | TSPVEGLSGNPADLEK*R | 75   | 1     | 18497667 |          |      |          |
| A0A024R9M9 | CHP     | Calcium binding protein P22, isoform CRA_a                                                       | ASTLLRDEELEEIKK*   | 19   | 0.541 | 10311250 |          |      |          |
| A0A024R9W5 | HUWE1   | HECT, UBA and WWE domain containing 1, isoform CRA_b                                             | SLLTEK*LLR         | 3452 | 1     | 48685000 | 21275000 | 2.29 | 2.93E-03 |
| A0A024R9Z8 | AHR     | Aryl hydrocarbon receptor, isoform CRA_a                                                         | HMQNEK*FFR         | 560  | 1     | 14323000 |          |      |          |
|            |         |                                                                                                  | LASLLPFPQDVINKLDK* | 66   | 0.534 | 4038300  |          |      |          |
|            |         |                                                                                                  | LASLLPFPQDVINK*LDK | 63   | 0.5   | 2493670  |          |      |          |
|            |         |                                                                                                  | QVVVEPQQQLCQKMK*   | 643  | 0.54  | 2859100  |          |      |          |
|            |         |                                                                                                  | QVVVEPQQQLCQK*MK   | 641  | 0.986 | 10786333 |          |      |          |
| A0A024RAM0 | TNPO1   | Transportin 1, isoform CRA_a                                                                     | K*CSAAALDVLANVYR   | 385  | 1     | 1395467  |          |      |          |

|            |             |                                                                                    |                        |      |       |          |          |      |          |
|------------|-------------|------------------------------------------------------------------------------------|------------------------|------|-------|----------|----------|------|----------|
|            |             |                                                                                    | SLSGLILKNNVK*          | 85   | 0.562 | 3631300  |          |      |          |
| A0A024RAM4 | MAP1B       | Microtubule-associated protein 1B, isoform CRA_b                                   | DLSTPGLEK*DSGGK        | 1858 | 0.706 | 3974050  |          |      |          |
|            |             |                                                                                    | SPDEEDYDYESYEK*TTR     | 1894 | 1     | 4461733  |          |      |          |
| A0A024RAU0 | OLR1        | Oxidised low density lipoprotein (Lectin-like) receptor 1, isoform CRA_a           | TFDDLK*IQTVK           | 7    | 1     | 6762533  |          |      |          |
| A0A024RAY2 | KRT18       | Keratin 18, isoform CRA_a                                                          | NLK*ASLENSLR           | 317  | 1     | 15345333 | 2478800  | 6.19 | 2.81E-02 |
| A0A024RB16 | FAM62A      | Family with sequence similarity 62 (C2 domain containing), member A, isoform CRA_a | K*LVSIVHGCR            | 997  | 1     | 41265667 |          |      |          |
| A0A024RBE7 | TMPO        | Thymopoietin, isoform CRA_c                                                        | YVPK*YVPLADVK          | 393  | 1     | 3264300  | 15731000 | 0.21 | 7.34E-03 |
| A0A024RBJ2 | KCTD10      | Potassium channel tetramerisation domain containing 10, isoform CRA_b              | TTSFK*GTSPSSK          | 25   | 1     | 4609000  | 17874333 | 0.26 | 6.97E-03 |
| A0A024RBS2 | RPLP0       | 60S acidic ribosomal protein P0                                                    | DMLLANK*VPAAAR         | 106  | 1     | 7666700  |          |      |          |
|            |             |                                                                                    | GHLENNPALEK*LLPHIR     | 77   | 1     | 10692650 |          |      |          |
| A0A024RBT0 | WDR66       | WD repeat domain 66, isoform CRA_a                                                 | K*TLLGPAYGSPIEQTQVLPVR | 837  | 1     | 7399500  |          |      |          |
|            |             |                                                                                    | TLSFSK*TPATPTEK        | 556  | 1     | 1724300  |          |      |          |
| A0A024RC65 | hCG_1991735 | HCG1991735, isoform CRA_a                                                          | ITLQDVVSHSK*K          | 935  | 0.825 | 2188050  |          |      |          |

|            |                  |                                                                                   |                                |      |       |           |          |       |          |
|------------|------------------|-----------------------------------------------------------------------------------|--------------------------------|------|-------|-----------|----------|-------|----------|
|            |                  |                                                                                   | LFK*TALQEEIK                   | 1027 | 1     | 7545933   | 37794667 | 0.20  | 1.24E-04 |
| A0A024RC92 | FES              | Tyrosine-protein kinase                                                           | NCLVTEK*NVLK                   | 694  | 0.956 | 4972600   |          |       |          |
|            |                  |                                                                                   | TLLQMVGDAAAGMEYLES<br>K*CCIHR  | 677  | 1     | 2125900   |          |       |          |
| A0A024RCJ2 | HIST1H2BJ        | Histone H2B                                                                       | PEPAK*SAPAPK                   | 6    | 1     | 13078700  | 33421000 | 0.39  | 2.84E-02 |
| A0A024RCL1 | DDR1             | Discoidin domain receptor<br>family, member 1, isoform<br>CRA_a                   | ILRPDATK*NAR                   | 663  | 1     | 616243333 |          |       |          |
|            |                  |                                                                                   | K*GHPLLVAVK                    | 646  | 1     | #####     | 29927667 | 41.31 | 6.21E-03 |
| A0A024RD80 | HSP90AB1         | Heat shock protein 90kDa alpha<br>(Cytosolic), class B member 1,<br>isoform CRA_a | K*HLEINPDHPIVETLR              | 624  | 1     | 2342633   |          |       |          |
|            |                  |                                                                                   | TLTLVDTGIGMTK*ADLINN<br>LGTIAK | 95   | 0.995 | 2597700   |          |       |          |
| A0A024RDL1 | CCT6A            | Chaperonin containing TCP1,<br>subunit 6A (Zeta 1), isoform<br>CRA_a              | IITEGFEEAAKEK*                 | 129  | 0.636 | 5513800   |          |       |          |
|            |                  |                                                                                   | IITEGFEEAAK*EK                 | 127  | 0.777 | 3113850   |          |       |          |
| A0A024RDS4 | GJB6             | Gap junction protein                                                              | NDFK*DIEDIKK                   | 116  | 1     | 7856333   |          |       |          |
|            |                  |                                                                                   | NHPNHALK*ESK                   | 237  | 1     | 11203000  |          |       |          |
| A0A024RDY4 | TFDP1            | Transcription factor Dp-1,<br>isoform CRA_a                                       | QK*QSQLQELILQQIAFK             | 219  | 1     | 2210267   |          |       |          |
| A0A024RE04 | RP11-<br>98F14.6 | Uncharacterized protein                                                           | AIDSSNLK*DDYSTAQR              | 255  | 1     | 10792733  |          |       |          |

|            |          |                                                                                |                       |     |       |          |          |      |          |
|------------|----------|--------------------------------------------------------------------------------|-----------------------|-----|-------|----------|----------|------|----------|
|            |          |                                                                                | K*AMFDSDFK            | 273 | 1     | 6335533  |          |      |          |
| A0A059WJG5 | HLA-DQB1 | MHC class I antigen                                                            | SQK*GPQGPPPAGLLH      | 257 | 1     |          | 2032190  |      |          |
| A0A087WUF0 | CYP4F3   | Docosahexaenoic acid omega-hydroxylase CYP4F3                                  | TLPSQGVDDFLQAKAK*     | 292 | 0.588 | 17476667 |          |      |          |
| A0A087WUW9 | ARL15    | ADP-ribosylation factor-like protein 15                                        | K*YFELEPLAR           | 157 | 1     | 1473050  |          |      |          |
| Q59FP5     |          | Spectrin, beta, erythrocytic (Includes spherocytosis, clinical type I) variant | IHCLENVDK*ALQFLK      | 122 | 1     |          | 5828450  |      |          |
| A0A087WVQ6 | CLTC     | Clathrin heavy chain                                                           | AHIAQLCEK*AGLLQR      | 623 | 1     | 7236700  |          |      |          |
| A0A087WYT3 | PTGES3   | Prostaglandin E synthase 3                                                     | DVNVNFEKSK*           | 39  | 0.725 | 7660100  |          |      |          |
|            |          |                                                                                | DVNVNFEK*SK           | 37  | 0.977 | 9921750  |          |      |          |
| A0A087X018 | SLC2A11  | Solute carrier family 2, facilitated glucose transporter member 11             | LSSQQNSSPK*           | 506 | 1     | 9515300  | 33305000 | 0.29 | 4.19E-02 |
| A0A087X211 | PSMC6    | 26S protease regulatory subunit 10B                                            | GCLLYGPPGTGK*TLLAR    | 194 | 1     | 4502467  |          |      |          |
|            |          |                                                                                | LDILK*IHAGPITK        | 328 | 0.999 | 15559000 |          |      |          |
|            |          |                                                                                | SENDLK*ALQSVGQIVGEVLK | 62  | 1     | 4433833  | 1867500  | 2.37 | 4.51E-03 |
| A0A090N8Q3 | C7orf21  | Chromosome 7 open reading frame 21                                             | AWPHDTIGSLK*R         | 129 | 1     | 5403200  |          |      |          |
|            |          |                                                                                | LK*FLNDSEQVAR         | 108 | 1     | 21404667 | 7453867  | 2.87 | 1.78E-02 |



|            |             |                                       |                                     |      |       |           |           |      |          |  |
|------------|-------------|---------------------------------------|-------------------------------------|------|-------|-----------|-----------|------|----------|--|
| A0A0A0MRK6 | MTX1        | Metaxin 1, isoform CRA_b              | VHK*ISNPWQSPSGTLPALR                | 190  | 1     | 2670300   |           |      |          |  |
| A0A0A6YYL4 | CORO7-PAM16 | Coronin                               | VPAEGLEEVLTTPETVLTGHTEK*ICSLR       | 596  | 1     | 10095300  |           |      |          |  |
| A0A0A6YZ17 | USP13       | Ubiquitin specific protease 13        | GLQPGEELPDISPPIVIPD<br>DSK*DR       | 640  | 1     | 10412667  | 3270850   | 3.18 | 3.51E-03 |  |
| A0A0A7KU15 | TSC1-PDGFRB | TSC1-PDGFEB fusion protein (Fragment) | MAQPAHASDEIYEIMQK*CWEEK             | 1215 | 0.951 | 5626267   | 1943433   | 2.90 | 2.15E-03 |  |
| A0A0C4DFL7 | CYP51A1     | Lanosterol 14-alpha demethylase       | TVCGENLPPLTYDQLK*DLNLLDR            | 364  | 1     | 6333467   |           |      |          |  |
| A0A0D9SF60 | PKP4        | Plakophilin-4                         | SPSIDSIQK*DPR                       | 517  | 1     | 12088300  |           |      |          |  |
| A0A0D9SGC1 | MYO6        | Unconventional myosin-VI              | SLDSYPVTSK*NDGTRPK                  | 1045 | 0.976 |           | 8417700   |      |          |  |
| A0A0G2JIW1 | HSPA1B      | Heat shock 70 kDa protein 1B          | AMTK*DNNLLGR                        | 452  | 1     | 49823667  | 15970000  | 3.12 | 4.22E-04 |  |
|            |             |                                       | K*FGDPVVQSDMK                       | 78   | 1     | 1198150   |           |      |          |  |
|            |             |                                       | LIGDAAK*NQVALNPQNTVFDAK             | 57   | 1     | 5952700   | 2585467   | 2.30 | 6.79E-04 |  |
|            |             |                                       | MVQEAEK*YKAEDEVQR                   | 525  | 1     | 442610000 | 126953333 | 3.49 | 6.21E-04 |  |
|            |             |                                       | QATK*DAGVIAGLNVLR                   | 160  | 1     | 7358333   | 1015630   | 7.25 | 4.69E-02 |  |
|            |             |                                       | RK*ELEQVCNPIISGLYQGAGGPGPGGFGAQQGPK | 598  | 1     | 36014000  | 4228233   | 8.52 | 3.59E-03 |  |
|            |             |                                       | VLDK*CQEVISWLDANTLAEKDEFEHK         | 574  | 1     | 8481900   |           |      |          |  |
|            |             |                                       | YK*AEDEVQR                          | 527  | 1     | 13685000  | 5775450   | 2.37 | 1.08E-02 |  |

|            |        |                                                                 |                       |     |       |           |          |        |          |
|------------|--------|-----------------------------------------------------------------|-----------------------|-----|-------|-----------|----------|--------|----------|
| A0A0S2Z2Z6 | ANXA6  | Annexin                                                         | AMK*GLGTDEDTIIDIITHR  | 377 | 1     | 6458700   | 22420333 | 0.29   | 4.77E-03 |
|            |        |                                                                 | K*AMKGLGTDEDTIIDIITHR | 374 | 0.532 | 3266750   | 11707733 | 0.28   | 1.10E-02 |
|            |        |                                                                 | TNEQMHQLVAAYK*DAYER   | 135 | 1     |           | 1858500  |        |          |
| A0A0S2Z3F2 | ARAF   | V-raf murine sarcoma 3611 viral oncogene-like protein isoform 2 | IGDFGLATVK*TR         | 459 | 1     | 1731650   |          |        |          |
| A0A0S2Z3L2 | ATP2A2 | ATPase Ca++ transporting cardiac muscle slow twitch 2 isoform 1 | NYLEPGK*ECVQPATK      | 995 | 0.999 | 4384300   |          |        |          |
| A0A0S2Z3S6 | CYBB   | Cytochrome b-245 beta polypeptide isoform 1                     | VVITK*VVTHPFK         | 299 | 0.999 | 1367100   |          |        |          |
| A0A0S2Z428 | KRT6A  | HCG2039812, isoform CRA_b                                       | EQIK*TLNNK            | 168 | 1     | 98273000  |          |        |          |
|            |        |                                                                 | FASFIDK*VR            | 180 | 1     | 126376667 | 23482000 | 5.38   | 2.57E-04 |
|            |        |                                                                 | FLEQQNK*VLETK         | 189 | 1     | #####     | 10115833 | 159.87 | 1.58E-03 |
|            |        |                                                                 | K*DVDAAYMNK           | 272 | 1     | 226880000 |          |        |          |
|            |        |                                                                 | K*LLEGEPCR            | 467 | 1     | 29342667  |          |        |          |
|            |        |                                                                 | K*QCANLQAAIADAEQR     | 400 | 1     | 18802800  |          |        |          |
|            |        |                                                                 | LLK*EYQELMNVK         | 446 | 1     | 2116667   |          |        |          |
|            |        |                                                                 | NTK*QEIAEINR          | 378 | 1     | 70925000  |          |        |          |
|            |        |                                                                 | TLNNK*FASFIDK         | 173 | 1     | 34488667  |          |        |          |

|            |         |                                                                            |                                 |      |       |          |          |      |          |
|------------|---------|----------------------------------------------------------------------------|---------------------------------|------|-------|----------|----------|------|----------|
|            |         |                                                                            | VELQAK*ADTLTDEINFLR             | 287  | 1     | 12984000 |          |      |          |
|            |         |                                                                            | WTLLEQEGTK*TVR                  | 204  | 1     | 69862333 |          |      |          |
| A0A0S2Z489 | PSMD12  | Proteasome (Prosome, macropain) 26S subunit, non-ATPase, 12, isoform CRA_a | LTK*TLATIK                      | 147  | 1     | 49735667 |          |      |          |
| A0A0S2Z4R4 | HGS     | Hepatocyte growth factor-regulated tyrosine kinase substrate isoform 1     | ATSTTELPPEYLTSPQSQQ<br>SQLPPK*R | 251  | 1     | 7627467  |          |      |          |
| A0A0S2Z4Y4 | CLINT1  | Clathrin interactor 1 isoform 1                                            | IGSTIDDTISK*FR                  | 218  | 1     | 4454667  |          |      |          |
| A0A0S2Z4Z9 | NONO    | Non-POU domain containing octamer-binding isoform 1                        | ALIEMEK*QQQDQVDR                | 279  | 1     | 4609100  |          |      |          |
|            |         |                                                                            | GIVEFSGK*PAAR                   | 198  | 1     | 7352767  |          |      |          |
|            |         |                                                                            | LVIK*NQQFHK                     | 243  | 0.999 | 19713000 |          |      |          |
| A0A0S2Z5V7 | HM13    | Histocompatibility 13 isoform 1                                            | GK*NASDMPETITSR                 | 61   | 1     | 1839190  |          |      |          |
| A0A140TA33 | TNXB    | Tenascin-X                                                                 | VTISGLEPDNK*YK                  | 2366 | 0.832 | 2602633  |          |      |          |
| A0A140VJG8 | COMT    | Testicular tissue protein Li 42                                            | K*GTVLLADNVICPGAPDFL<br>AHVR    | 212  | 1     | 27038333 | 10424400 | 2.59 | 8.83E-03 |
| A0A140VJK6 | GMPS    | Testicular tissue protein Li 82                                            | SGNIVAGIANESKK*                 | 183  | 0.908 | 8026933  |          |      |          |
| A0A140VJL3 | HPRT1   | Testicular tissue protein Li 89                                            | MVK*VASLLVK                     | 159  | 1     | 14026467 | 5564967  | 2.52 | 3.86E-02 |
| A0A140VJQ6 | OSBPL11 | Oxysterol-binding protein                                                  | VVLPTFILEK*R                    | 395  | 1     | 3165300  |          |      |          |

|            |         |                                         |                                  |     |       |          |          |      |          |
|------------|---------|-----------------------------------------|----------------------------------|-----|-------|----------|----------|------|----------|
| A0A140VJS0 |         | Serine/threonine-protein phosphatase    | ELDQWVEQLNECK*QLNE<br>NQVR       | 21  | 1     | 12665000 | 26560667 | 0.48 | 4.19E-02 |
| A0A140VJS3 | PSMC5   | 26S protease regulatory subunit 8       | K*IAELMPGASGAEVK                 | 346 | 1     | 6329200  |          |      |          |
|            |         |                                         | LDILK*IHSR                       | 330 | 1     | 18141000 |          |      |          |
|            |         |                                         | NIK*VIMATNR                      | 290 | 1     | 10724233 |          |      |          |
| A0A140VJT0 | PPP2R2A | Serine/threonine-protein phosphatase 2A | VVIFQQEQENK*IQSHSR               | 62  | 1     | 3207467  |          |      |          |
| A0A140VJT8 | RNH1    | Ribonuclease inhibitor                  | AKPDFK*ELTVSNNDINEAG<br>VR       | 173 | 0.877 |          | 16521000 |      |          |
|            |         |                                         | AK*ESLKELSLAGNELGDE<br>GAR       | 283 | 1     |          | 13921667 |      |          |
|            |         |                                         | DLCGIVASK*ASLR                   | 226 | 1     | 724120   | 39561667 | 0.02 | 1.53E-03 |
|            |         |                                         | DSPCQLEALK*LESCGVTS<br>DNCR      | 205 | 1     |          | 12000667 |      |          |
|            |         |                                         | ELALGSNK*LGDVGMAELC<br>PGLLHPSSR | 238 | 1     |          | 35136333 |      |          |
|            |         |                                         | LQALEK*DKPSLR                    | 452 | 0.989 |          | 60279000 |      |          |
|            |         |                                         | SNELGDVGVHCVLQGLQT<br>PSCK*IQK   | 86  | 0.886 |          | 9840133  |      |          |
|            |         |                                         | VLCQGLK*DSPCQLEALK               | 195 | 1     |          | 15670800 |      |          |
| A0A140VJZ1 | USP5    | Ubiquitin carboxyl-terminal hydrolase 5 | ALIGK*GHPEFSTNR                  | 423 | 1     | 78502667 | 29308000 | 2.68 | 1.07E-02 |
|            |         |                                         | IGEWELIQESGVPLK*PLFG<br>PGYTGIR  | 318 | 1     | 4528433  |          |      |          |

|            |          |                                                                                         |                                       |     |       |          |           |      |          |
|------------|----------|-----------------------------------------------------------------------------------------|---------------------------------------|-----|-------|----------|-----------|------|----------|
|            |          |                                                                                         | SAADSISESVPVGPV*VR                    | 793 | 1     | 16568667 | 5725467   | 2.89 | 3.31E-02 |
| A0A140VK42 | PSMC3    | 26S protease regulatory subunit 6A                                                      | K*MNVSPDVNYEELAR                      | 372 | 1     | 1752400  |           |      |          |
|            |          |                                                                                         | LLDSEIK*IMK                           | 53  | 1     | 1727750  | 5224300   | 0.33 | 1.06E-02 |
| A0A140VK56 | TALDO1   | Transaldolase                                                                           | LIELYK*EAGISK                         | 130 | 1     | 4997800  |           |      |          |
| A0A140VK70 | PSMC2    | 26S protease regulatory subunit 7                                                       | QIK*QVEDDIQQLLK                       | 46  | 1     | 6017400  | 1213663   | 4.96 | 4.59E-03 |
| A0A140VKA6 | ST13     | Hsc70-interacting protein                                                               | LSAK*FGGQA                            | 364 | 1     | 72780333 | 10743500  | 6.77 | 1.96E-02 |
|            |          |                                                                                         | YQSNPK*VMNLISK                        | 353 | 1     | 7436167  |           |      |          |
| A0A1B0GVY  | NEDD4L   | E3 ubiquitin-protein ligase NEDD4-like                                                  | SLSSPTVTLAPLEGAK*DS<br>PVRR           | 741 | 1     | 2528067  |           |      |          |
| A2RU94     | RAB27A   | RAB27A, member RAS oncogene family                                                      | CVDK*SWIPEGVVR                        | 191 | 1     | 1586650  |           |      |          |
| A3R0T8     | HIST1H1E | Histone 1                                                                               | SETAPAAPAAPAPAEK(0.28)<br>)TPVK(0.72) | 21  | 0.72  | 12280167 | 118173667 | 0.10 | 9.18E-03 |
| A4D177     | CBX3     | Chromobox homolog 3                                                                     | SLSDSESDDSK(0.413)SK(0.<br>.587)      | 105 | 0.587 | 2676050  |           |      |          |
| A4D2P0     | RAC2     | Ras-related C3 botulinum toxin substrate 2 (Rho family, small GTP binding protein Rac2) | MQAIK(1)CVVVG DGAVGK                  | 5   | 1     | 4380833  |           |      |          |
| A4D2Q0     | UNC84A   | Unc-84 homolog A                                                                        | EQTTVDHFWGLDDDGLK<br>GGNK*            | 221 | 0.558 | 2794033  | 13836000  | 0.20 | 5.26E-04 |
|            |          |                                                                                         | K*DVLTAHPAAPGPVSR                     | 253 | 1     | 3653200  | 8860600   | 0.41 | 3.92E-02 |

|        |         |                                                                                                                         |                                  |     |       |          |          |       |          |  |
|--------|---------|-------------------------------------------------------------------------------------------------------------------------|----------------------------------|-----|-------|----------|----------|-------|----------|--|
| A5Y5A3 | TPD52   | PC1/MRPS28 fusion protein                                                                                               | VEEEIQTLSQVLAAK*EK               | 100 | 0.773 | 8423850  |          |       |          |  |
| A7UJ17 | DNAJB6  | DnaJ homolog subfamily B member 6                                                                                       | QVAEAYEVLSDAKK*R                 | 61  | 0.55  | 7500100  |          |       |          |  |
| Q5EFE5 |         | Anti-RhD monoclonal T125 gamma1 heavy chain                                                                             | FNWYVDGVEVHNAKTK*P<br>R          | 318 | 0.5   |          | 3819950  |       |          |  |
|        |         | Anti-RhD monoclonal T125 gamma1 heavy chain                                                                             | FNWYVDGVEVHNAK*TKP<br>R          | 316 | 0.818 |          | 5002650  |       |          |  |
| A8K0M6 | TMEM87A | Transmembrane protein 87A                                                                                               | FAFSPLSEEEEEDEQK*EP<br>MLK       | 484 | 0.996 | 10838233 |          |       |          |  |
| A8K0R1 | DNAJB2  | DnaJ homolog subfamily B member 2                                                                                       | SASADDIKK*                       | 21  | 0.579 | 11633500 | 5665200  | 2.05  | 1.53E-02 |  |
| A8K287 | SNAP23  | Synaptosomal-associated protein                                                                                         | TITMLDEQK*EQLNR                  | 49  | 1     | 13061500 |          |       |          |  |
| A8K2G0 |         | cDNA FLJ76605, highly similar to Homo sapiens secretory carrier membrane protein 1 (SCAMP1), transcript variant 1, mRNA | TVQTAAANAASTAASSAAQ<br>NAFK*GNQI | 334 | 1     | 4723133  | 14354500 | 0.33  | 2.40E-03 |  |
| A8K2M0 | PSMC4   | 26S protease regulatory subunit 6B                                                                                      | ENAPAIIFIDEIDAIATK*R             | 273 | 1     | 8303567  |          |       |          |  |
| A8K2T7 | EGFR    | Epidermal growth factor receptor                                                                                        | GLWIPEGEK*VKIPVAIK               | 737 | 0.986 | 72020333 | 2878400  | 25.02 | 2.76E-03 |  |
|        |         |                                                                                                                         | IK*VLGSGAFGTVYK                  | 716 | 1     | 7182967  |          |       |          |  |
|        |         |                                                                                                                         | ITDFGLAK*LLGAEEK                 | 860 | 1     | 13363000 |          |       |          |  |
|        |         |                                                                                                                         | VK*IPVAIK                        | 739 | 1     | 76911000 | 4852300  | 15.85 | 2.08E-03 |  |
| A8K2U2 | HK2     | Hexokinase-2                                                                                                            | EELLFGGK*LSPELLNTGR              | 323 | 1     | 1455850  |          |       |          |  |

|        |        |                                                                                                                     |                          |     |       |          |           |      |          |
|--------|--------|---------------------------------------------------------------------------------------------------------------------|--------------------------|-----|-------|----------|-----------|------|----------|
|        |        |                                                                                                                     | TLEHLQLSHDQLLEVK*R       | 488 | 1     | 2250000  |           |      |          |
| A8K2W3 | SDPR   | Serum deprivation-response protein                                                                                  | QISLEGSVK*GIQNDLTK       | 91  | 1     | 2499520  | 50769000  | 0.05 | 1.58E-03 |
|        |        |                                                                                                                     | YQASTSNTVSK*LLEK         | 113 | 0.997 | 8479300  | 89404667  | 0.09 | 4.35E-05 |
| A8K556 | GPRC5A | Retinoic acid-induced protein 3                                                                                     | AHAWSPSPYKDYEKK*         | 354 | 0.563 |          | 37251333  |      |          |
|        |        |                                                                                                                     | K*SYGVENR                | 291 | 1     | 7761800  | 254813333 | 0.03 | 2.45E-02 |
|        |        |                                                                                                                     | QRNPMDYPVEDAFCK*PQLVK    | 285 | 1     | 6283200  | 136276667 | 0.05 | 2.70E-03 |
| A8K5D4 | MPZL1  | Myelin protein zero-like 1, isoform CRA_b                                                                           | DYTGCSSTSESLSPVK*QAPR    | 213 | 1     | 2699967  |           |      |          |
| A8K7F6 | EIF4A1 | Eukaryotic initiation factor 4A-I                                                                                   | DFTVSAMHGDMQK*ER         | 309 | 1     | 34460333 |           |      |          |
|        |        |                                                                                                                     | K*GVAINMVTEEDKR          | 369 | 1     | 20796000 |           |      |          |
|        |        |                                                                                                                     | KGVAINMVTEEDK*R          | 381 | 1     | 4192700  |           |      |          |
| A8K9G0 |        | cDNA FLJ78634, highly similar to Homo sapiens solute carrier family 34 (sodium phosphate), member 2 (SLC34A2), mRNA | ETNK*NNTEAPVTK           | 37  | 1     |          | 13147800  |      |          |
| A8K9K6 | NOP56  | Nucleolar protein 56                                                                                                | SK*MSQVAPSLSALIGEAVGAR   | 288 | 1     | 1498667  |           |      |          |
| B0I1T2 | MYO1G  | Unconventional myosin-Ig                                                                                            | AK*VAAMGALQGLR           | 815 | 1     | 6919933  |           |      |          |
| B0QZ18 | CPNE1  | Copine-1                                                                                                            | AQGWAPLKPLPPSAK*DPAQAPQA | 534 | 0.896 | 8956100  |           |      |          |

|        |          |                                               |                          |      |       |           |           |      |          |  |
|--------|----------|-----------------------------------------------|--------------------------|------|-------|-----------|-----------|------|----------|--|
| B0YJ88 | RDX      | Radixin                                       | K*QLQALSSELAQAR          | 526  | 1     | 2675933   |           |      |          |  |
|        |          |                                               | VLEQHK*LTK               | 162  | 1     | 8518533   | 136634333 | 0.06 | 4.57E-02 |  |
| B2R4P9 | H3F3A    | Histone H3                                    | SAPSTGGVK*KPHR           | 37   | 0.91  | 6369150   | 18078667  | 0.35 | 2.85E-02 |  |
| B2R4R0 | HIST1H4H | Histone H4                                    | DNIQGITK*PAIR            | 32   | 1     | 187833333 | 66228333  | 2.84 | 4.90E-03 |  |
|        |          |                                               | GVLK*VFLENVIR            | 60   | 1     | 1905350   |           |      |          |  |
| B2R6J2 | EZR      | Ezrin                                         | FGDYNK*EVHK              | 139  | 1     | 3616200   | 15984667  | 0.23 | 1.70E-03 |  |
| B2R6U9 | JAG1     | Delta-like protein                            | EQLNQIK*NPIEK            | 1123 | 0.989 | 7615333   |           |      |          |  |
| B2R761 | SCP2     | Non-specific lipid-transfer protein           | GSVLPNSDKK*              | 492  | 0.573 |           | 6877400   |      |          |  |
|        |          |                                               | GSVLPNSDK*K              | 491  | 0.981 | 3078500   |           |      |          |  |
| B2R914 | SCP2     | Non-specific lipid-transfer protein           | DIEEIK*TQK               | 122  | 0.999 | 42979667  |           |      |          |  |
|        |          |                                               | SEFK*DIEEIK              | 116  | 1     | 16215033  |           |      |          |  |
| B2R960 | TXNL1    | Thioredoxin-like protein 1                    | IK*QHLENDPGSNEDTDIPK     | 104  | 1     | 4758500   |           |      |          |  |
| B2RBP3 | UBA3     | NEDD8-activating enzyme E1 catalytic subunit  | VPNCNVVPHFNK*IQDFND TFYR | 147  | 1     | 8662067   | 29567333  | 0.29 | 8.35E-03 |  |
| B2RE75 | MERTK    | Tyrosine-protein kinase Mer                   | LQLEK*LLES LPDVR         | 856  | 1     | 3696900   | 579933    | 6.37 | 3.33E-03 |  |
| B3KR37 | EPS15    | Epidermal growth factor receptor substrate 15 | EK*DPEIFCDPFTSATTTTN K   | 430  | 1     |           | 14547333  |      |          |  |



|        |                  |                                                                                    |                            |     |       |          |          |      |          |
|--------|------------------|------------------------------------------------------------------------------------|----------------------------|-----|-------|----------|----------|------|----------|
| B3KXY9 |                  | cDNA FLJ46359 fis, clone TESTI4049786, highly similar to Hexokinase-1 (EC 2.7.1.1) | DFNPTATVK*MLPTFVR          | 97  | 1     | 1027970  |          |      |          |
| B4DE59 | KRT19<br>Keratin | Keratin, type I cytoskeletal 19 OS=Homo s                                          | SLLEGQEDHYNNLSASK*V<br>L   | 561 | 1     | 5327300  |          |      |          |
| B4DGC6 |                  | cDNA FLJ58177, highly similar to Transmembrane protein 94                          | ALSVLK*EQLEAVLEGHLR        | 37  | 1     | 9129300  |          |      |          |
| B4DIH5 | COPS2            | COP9 signalosome complex subunit 2                                                 | IDQVNQLLELDHQQ*R           | 351 | 1     | 3918433  |          |      |          |
| B4DKQ5 | TOM1             | Target of Myb protein 1                                                            | KEVK*YEAPQATDGLAGAL<br>DAR | 394 | 0.8   | 5936433  |          |      |          |
|        |                  |                                                                                    | K*GLEFPMTDLMLSPIHTP<br>QR  | 156 | 1     | 2437100  |          |      |          |
| B4DNB9 | AP2M1            | AP-2 complex subunit                                                               | VVIK*SNFKPSLLAQK           | 333 | 1     | 52845000 |          |      |          |
| B4DPJ8 |                  | cDNA FLJ52344, highly similar to T-complex protein 1 subunit                       | AAVK*TLNPK                 | 5   | 0.999 | 26940000 | 10010133 | 2.69 | 9.12E-03 |
| B4DWA6 | CAPZB            | Capping protein (Actin filament) muscle Z-line, beta, isoform                      | STLNEIYFGKTK*              | 300 | 0.702 |          | 9646300  |      |          |
|        |                  |                                                                                    | STLNEIYFGK*TK              | 298 | 0.927 | 16524500 |          |      |          |
| B4DZF2 |                  | cDNA FLJ59571, highly similar to Eukaryotic translation initiation factor 4gamma 2 | LLISK*LQDEFENR             | 243 | 1     | 2475067  |          |      |          |
| B4E0B1 | SLFN5            | Schlafen family member 5                                                           | NSECLK*EQQK                | 371 | 1     | 2123500  |          |      |          |
| B4E0Y9 | STK24            | Serine/threonine-protein kinase 24                                                 | LADFGVAGQLTDTQIK*R         | 194 | 1     | 4478600  |          |      |          |
| B4E1U9 | CDC42            | Cell division cycle 42 (GTP binding protein, 25kDa), isoform                       | AVK*YVECSALTQK             | 198 | 1     | 15904333 |          |      |          |

|        |       |                                                    |                             |     |       |           |           |      |          |
|--------|-------|----------------------------------------------------|-----------------------------|-----|-------|-----------|-----------|------|----------|
| B4E2S3 | RFTN1 | RFTN1 protein                                      | K*IQEAASQGLK                | 361 | 1     | 6675933   | 19214333  | 0.35 | 1.97E-02 |
| B4E3D4 | GPNMB | Transmembrane glycoprotein NMB                     | AVFFPGNQEKDPLLKNQEFK*       | 604 | 0.631 | 10884233  |           |      |          |
| B4E3I3 | UFD1L | Ubiquitin fusion degradation 1 like, isoform CRA_b | GGK*IIMPPSALDQLSR           | 45  | 1     | 4806900   |           |      |          |
| B5MCA4 | EPCAM | Epithelial cell adhesion molecule                  | AEIK*EMGEMHR                | 331 | 1     | 16770667  |           |      |          |
| B7Z3K9 | ALDOC | Fructose-bisphosphate aldolase                     | VDK*GVVPLAGTDGETTTQGLDGLSER | 198 | 1     | 12935100  |           |      |          |
| B7Z4C3 | EPB42 | Erythrocyte membrane protein band 4.2              | QVEK*WSQPVHVAR              | 204 | 1     |           | 8997367   |      |          |
| B7Z6Z4 | MYL6  | Myosin light polypeptide 6                         | NK*DQGTIEDYVEGLR            | 174 | 1     |           | 3850550   |      |          |
| B7ZKM5 | EPN2  | Epsin-2                                            | QLVALLK*DEER                | 135 | 1     | 24416667  | 67412667  | 0.36 | 7.34E-04 |
| B7ZLH8 | EVPL  | Envoplakin, isoform CRA_a                          | SLK*EAEVLLK                 | 88  | 1     |           | 13392367  |      |          |
| D1MGQ2 | HBA2  | Alpha-2 globin chain                               | AAWGK*VGAHAGEYGAEALER       | 17  | 1     | 3086200   | 60241333  | 0.05 | 2.86E-03 |
|        |       |                                                    | MFLSFPTTK*TYFPHFDLSHGSAQVK  | 41  | 1     | 6943233   | 47453333  | 0.15 | 7.49E-04 |
|        |       |                                                    | TNVK*AAWGK                  | 12  | 1     | 9067100   | 148336667 | 0.06 | 2.92E-03 |
|        |       |                                                    | TYFPHFDLSHGSAQVKGHGK*       | 61  | 0.573 | 1313967   | 40544000  | 0.03 | 2.88E-02 |
|        |       |                                                    | TYFPHFDLSHGSAQVK*GHGK       | 57  | 0.953 | 3317650   | 49644333  | 0.07 | 3.80E-02 |
|        |       |                                                    | VADALTNAVAHVDDMPNAL         | 91  | 1     | 188843333 | #####     | 0.05 | 1.10E-06 |
|        |       |                                                    | SALSDLHAHK*LR               |     |       |           |           |      |          |

|        |          |                                                                                                           |                                           |     |       |          |           |      |          |
|--------|----------|-----------------------------------------------------------------------------------------------------------|-------------------------------------------|-----|-------|----------|-----------|------|----------|
|        |          |                                                                                                           | VLSPADK*TNVK                              | 8   | 0.999 |          | 29599333  |      |          |
| D3DNI3 | PFN2     | Profilin                                                                                                  | EGVHGGTLNK*K                              | 326 | 0.997 | 11854133 |           |      |          |
|        |          |                                                                                                           | TK*SQGGPEPTYNVAVGR                        | 285 | 1     | 61698000 |           |      |          |
| D3DRP5 | GLIPR2   | Golgi-associated plant pathogenesis-related protein 1                                                     | QFHNEVLK*AHNEYR                           | 212 | 1     |          | 3835267   |      |          |
| D3DS14 | ARHGEF40 | Rho guanine nucleotide exchange factor 40                                                                 | FVHK*EGLMVGHQSTLPP<br>ELPSGPPGLPSPPLPEEAL | 189 | 1     |          | 6237267   |      |          |
| D3DV26 | S100A10  | S100 calcium binding protein A10 (Annexin II ligand, calpactin I, light polypeptide (P11)), isoform CRA b | <sup>CTP</sup><br>EFPGFLENQK*DPLAVDK      | 155 | 1     | 24818667 | 55644667  | 0.45 | 5.29E-03 |
|        |          |                                                                                                           | VLMEK*EFPGFLENQKDPL<br>AVDK               | 145 | 1     | 12729700 | 49501333  | 0.26 | 3.06E-04 |
| D9YZU5 | HBB      | Beta-globin                                                                                               | FFESFGDLSTPDAVMGNP<br>KVK*                | 62  | 0.632 | 3042233  | 54282000  | 0.06 | 6.30E-03 |
|        |          |                                                                                                           | FFESFGDLSTPDAVMGNP<br>K*VK                | 60  | 0.842 |          | 41211233  |      |          |
|        |          |                                                                                                           | GTFATLSELHCDK*LHVDP<br>ENFR               | 96  | 1     | 59983667 | 621670000 | 0.10 | 1.84E-04 |
|        |          |                                                                                                           | K*VLGAFSDGLAHLNLIK                        | 67  | 1     | 2427133  | 75085667  | 0.03 | 4.71E-05 |
|        |          |                                                                                                           | VHLTPEEK*SAVTALWGK                        | 9   | 1     | 1973433  | 37851667  | 0.05 | 1.22E-04 |
|        |          |                                                                                                           | VLGAFSDGLAHLNLIK*GT<br>FATLSELHCDK        | 83  | 1     |          | 4813267   |      |          |
|        |          |                                                                                                           | VVAGVANALAHK*YH                           | 145 | 1     | 28533333 | 172665000 | 0.17 | 1.84E-02 |

|        |           |                                                                            |                                 |       |       |          |           |       |          |  |
|--------|-----------|----------------------------------------------------------------------------|---------------------------------|-------|-------|----------|-----------|-------|----------|--|
| E1NZA1 | GCN1L1    | Peroxisome proliferator activated receptor interacting complex protein     | DLAPYLPSVTPGLK*ASLLD<br>PVPEVR  | 1663; | 1     | 1122950  |           |       |          |  |
| E3UVQ2 | BCOR-RARA | BCL6 corepressor-cyclin B3 fusion protein                                  | RLIVNK*NAGETLLQR                | 1408  | 1     | 98486667 | 47728333  | 2.06  | 8.69E-03 |  |
| E3WH17 | SQSTM1    | Tyrosine-protein kinase receptor                                           | CSVCPDYDLCSVCEGK*GL<br>HR       | 157   | 1     | 21644000 |           |       |          |  |
| E5KRG5 | TYMP      | Thymidine phosphorylase                                                    | VSLVLAPALAACGCK*VPMI<br>SGR     | 139   | 1     | 2244900  |           |       |          |  |
| E7EMK3 | FLOT2     | Flotillin-2                                                                | NVQDIK*NVVLQTLEGHLR             | 155   | 1     | 5600533  | 354415    | 15.80 | 1.99E-02 |  |
| E7EX29 | YWHAZ     | 14-3-3 protein zeta/delta                                                  | VVSSIEQK*TEGAEK                 | 68    | 0.996 |          | 2416007   |       |          |  |
| E9PAV3 | NACA      | Nascent polypeptide-associated complex subunit alpha, muscle-specific form | IEDLSQQAQLAAAEKFK*              | 2007  | 0.588 | 16473667 |           |       |          |  |
| E9PEJ6 | ATP11A    | Phospholipid-transporting ATPase                                           | AADTIEALQK*AGIK                 | 678   | 0.999 | 69929333 | 31607667  | 2.21  | 4.45E-03 |  |
|        |           |                                                                            | VIEGK*VDQIR                     | 590   | 1     | 8181033  | 25840333  | 0.32  | 1.02E-02 |  |
| E9PIE3 | PRKCDBP   | Protein kinase C delta-binding protein                                     | SHDTTSNTLAQLLAK*AER             | 84    | 1     | 42051333 | 216750000 | 0.19  | 7.51E-04 |  |
| E9PKP7 | UBTF      | Nucleolar transcription factor 1                                           | LK*WVEISNEVR                    | 71    | 1     | 2564750  |           |       |          |  |
| F1DSG4 | AQP4      | Aquaporin 4 transcript variant                                             | AAQQTK*GSYMEVEDNR               | 274   | 1     | 8524267  | 84575333  | 0.10  | 1.10E-02 |  |
|        |           |                                                                            | KGK*DQSGEVLSSV                  | 313   | 0.5   |          | 8009200   |       |          |  |
|        |           |                                                                            | K*GKDQSGEVLSSV                  | 311   | 0.588 |          | 12877933  |       |          |  |
|        |           |                                                                            | SQVETDDLILK*PGVVHVID<br>VDRGEEK | 295   | 1     | 15621567 | 325490000 | 0.05  | 4.08E-02 |  |

|        |            |                                                     |                                |     |       |          |          |      |          |  |
|--------|------------|-----------------------------------------------------|--------------------------------|-----|-------|----------|----------|------|----------|--|
| F8VYN9 | ARL1       | ADP-ribosylation factor-like protein 1              | IGISK*SELVAMLEEEELR            | 104 | 1     | 7795367  |          |      |          |  |
| F8VZU9 | MYL6       | Myosin light polypeptide 6                          | NK*DQGTYEDYVEGLR               | 33  | 1     |          | 3850550  |      |          |  |
| F8W930 | IGF2BP2    | Insulin-like growth factor 2 mRNA-binding protein 2 | FAGASIK*IAPAEQPDVSER           | 468 | 1     | 11153450 |          |      |          |  |
|        |            |                                                     | NITK*QTQSR                     | 227 | 1     | 5516800  |          |      |          |  |
| F8WCF6 | ARPC4-TLL3 | Actin-related protein 2/3 complex subunit 4         | SSK*ELLQPVITISR                | 44  | 1     | 1434650  |          |      |          |  |
| G3V1N2 | HBA2       | HCG1745306, isoform CRA_a                           | MFLSFPTTK*TYFPHFDLSH<br>GSAQVK | 9   | 1     | 6943233  | 48808000 | 0.14 | 7.02E-04 |  |
|        |            |                                                     | TYFPHFDLSHGSAQVK*GH<br>GK      | 25  | 0.953 | 3317650  | 49644333 | 0.07 | 3.80E-02 |  |
| G3V4X1 | PSMC1      | 26S protease regulatory subunit 4                   | TLLAK*AVANQTSATF               | 74  | 1     | 7941300  |          |      |          |  |
| G3V5Z7 | PSMA6      | Proteasome subunit alpha type                       | K*VPDKLLDSSTVTHLFLK            | 55  | 0.999 | 14948333 | 2045967  | 7.31 | 1.75E-03 |  |
| H0Y300 | HP         | Haptoglobin                                         | HYEGSTVPEKK*                   | 358 | 0.568 |          | 19669000 |      |          |  |
| H0Y4R2 | POR        | NADPH--cytochrome P450 reductase                    | SYENQKPPFDAK*NPFLAA<br>VTTNR   | 333 | 0.96  | 8968033  |          |      |          |  |
|        |            |                                                     | SYENQK*PPFDAK                  | 327 | 1     | 13784467 |          |      |          |  |
| H0Y7A7 | CALM2      | Calmodulin                                          | DGDGTITTK*ELGTVMR              | 69  | 1     |          | 5066167  |      |          |  |
| I4AY87 | MIF        | Macrophage migration inhibitory factor              | SYSK*LLCGLLAER                 | 78  | 1     | 7423533  |          |      |          |  |
| J3KPF3 | SLC3A2     | 4F2 cell-surface antigen heavy chain                | FTGLSK*EELLK                   | 167 | 1     | 53691667 |          |      |          |  |

|        |         |                                                 |                           |     |       |          |          |      |          |
|--------|---------|-------------------------------------------------|---------------------------|-----|-------|----------|----------|------|----------|
| J3KPQ4 | ARHGAP9 | Rho GTPase activating protein 9, isoform CRA_a  | VSGNLAVVQK*LR             | 659 | 1     | 5802000  |          |      |          |
| J3QLH6 | PSMC5   | 26S protease regulatory subunit 8               | VSGSELVQK*F               | 214 | 1     | 19623333 |          |      |          |
| K7ELC2 | RPS15   | 40S ribosomal protein S15                       | EAPPMEKPEVVK*THLR         | 84  | 1     | 15901000 |          |      |          |
| K7EPF9 | APOC1   | Apolipoprotein C-I                              | LKEFGNTLEDK*AR            | 47  | 1     | 20476000 | 67669667 | 0.30 | 4.65E-02 |
| L7N2F9 | VAMP2   | Vesicle-associated membrane protein 2           | DQK*LSELDDR               | 59  | 1     | 5907633  | 29678333 | 0.20 | 5.53E-03 |
| M0QYS1 | RPL13A  | 60S ribosomal protein L13a                      | LAAIVAK*QVLLGR            | 24  | 1     | 6425000  |          |      |          |
| O00231 | PSMD11  | 26S proteasome non-ATPase regulatory subunit 11 | EASIDILHSIVK*R            | 32  | 1     | 2674600  |          |      |          |
| O14495 | PLPP3   | Phospholipid phosphatase 3                      | K*EILSPVDIIDR             | 293 | 1     |          | 1490600  |      |          |
| O14727 | APAF1   | Apoptotic protease-activating factor 1          | LPLNIEEAK*DR              | 224 | 1     | 7756200  |          |      |          |
| O15162 | PLSCR1  | Phospholipid scramblase 1                       | FTIQNEK*R                 | 223 | 1     | 25526333 | 4755200  | 5.37 | 3.56E-02 |
|        |         |                                                 | SLDEQCVVGK*ISK            | 258 | 0.981 | 2242650  |          |      |          |
| O15247 | CLIC2   | Chloride intracellular channel protein 2        | LNIHK*VAAK                | 194 | 1     | 7966300  | 74717667 | 0.11 | 5.17E-03 |
| O43175 | PHGDH   | D-3-phosphoglycerate dehydrogenase              | NAGNCLSPAVIVGLLK*EAS<br>K | 380 | 0.8   | 2405550  |          |      |          |
|        |         |                                                 | SATK*VTADVINAEEK          | 58  | 1     | 2080250  |          |      |          |
| O43242 | PSMD3   | 26S proteasome non-ATPase regulatory subunit 3  | LVSK*SVFPEQANNNEWAR       | 273 | 1     | 2132100  |          |      |          |

|        |         |                                            |                             |     |       |           |          |       |          |
|--------|---------|--------------------------------------------|-----------------------------|-----|-------|-----------|----------|-------|----------|
| O43291 | SPINT2  | Kunitz-type protease inhibitor 2           | TVWSSGDDK*EQLVK             | 242 | 1     | 9592600   |          |       |          |
| O43491 | EPB41L2 | Band 4.1-like protein 2                    | ELEEK*VAELHK                | 374 | 1     |           | 4330550  |       |          |
|        |         |                                            | GLSPAQADSQFLENAK*R          | 399 | 1     | 2512290   | 11551600 | 0.22  | 3.44E-02 |
|        |         |                                            | GQVLFDK*VCEHLNLEK           | 246 | 1     | 2988733   | 32127000 | 0.09  | 2.64E-04 |
| O43567 | EPB41L2 | Band 4.1-like protein 2                    | CVDPWLTK*TK                 | 273 | 0.865 | 10592367  |          |       |          |
|        |         |                                            | K*GDEYDVCAICLDEYEDG<br>DKLR | 233 | 1     | 8548267   |          |       |          |
| O60218 | AKR1B15 | Aldo-keto reductase family 1<br>member B15 | LLNK*PGLK                   | 173 | 1     | 128918000 | 8640000  | 14.92 | 3.19E-02 |
| O60493 | SNX3    | Sorting nexin-3                            | K*QGLEQFINK                 | 119 | 1     | 5734033   |          |       |          |
|        |         |                                            | VVVPPLPGK*AFLR              | 95  | 1     | 3824000   |          |       |          |
| O60716 | CTNND1  | Catenin delta-1                            | ELIGK*HAIPNLVK              | 749 | 1     | 2544467   |          |       |          |
|        |         |                                            | ESK*TPAILEASAGAIQNLC<br>AGR | 676 | 1     | 6375033   |          |       |          |
|        |         |                                            | K*GGPPPNWR                  | 355 | 1     | 107280333 | 21515333 | 4.99  | 3.17E-02 |
|        |         |                                            | LK*GIPVLVGLLDHPK            | 408 | 1     | 1862533   |          |       |          |
|        |         |                                            | LVLINK*SGNR                 | 810 | 1     | 14877000  |          |       |          |
| O75312 | ZPR1    | Zinc finger protein ZPR1                   | TNEVK*SGGAVEPLGTR           | 299 | 1     | 19857333  | 5542150  | 3.58  | 2.51E-02 |

|        |         |                                                 |                          |      |       |          |           |      |          |
|--------|---------|-------------------------------------------------|--------------------------|------|-------|----------|-----------|------|----------|
| O75592 | MYCBP2  | E3 ubiquitin-protein ligase MYCBP2              | NITINCVK*GINAR           | 3750 | 1     | 3419700  |           |      |          |
| O75832 | PSMD10  | 26S proteasome non-ATPase regulatory subunit 10 | ESILADK*SLATR            | 30   | 1     | 2463450  |           |      |          |
| O94888 | UBXN7   | UBX domain-containing protein 7                 | DVWSNEAVK*NIIR           | 194  | 1     | 2257067  |           |      |          |
| O95183 | VAMP5   | Vesicle-associated membrane protein 5           | GVK*LAELQQR              | 33   | 1     |          | 2264350   |      |          |
| O95236 | APOL3   | Apolipoprotein L3                               | TYAAIEDEYVQQK*DEQFR      | 144  | 1     | 3457967  |           |      |          |
| O95436 | SLC34A2 | Sodium-dependent phosphate transport protein 2B | EAQGEVPASDSK*TECTAL      | 684  | 1     | 8349467  | 30182333  | 0.28 | 3.01E-03 |
| P00558 | PGK1    | Phosphoglycerate kinase 1                       | ALESPERPFLAILGGAK*VADK   | 216  | 0.813 | 4220333  |           |      |          |
| P00915 | CA1     | Carbonic anhydrase 1                            | ASPDWGYDDK*NGPEQWSK      | 11   | 1     |          | 4795467   |      |          |
|        |         |                                                 | HDTSLK*PISVSYNPATAK      | 46   | 1     | 3181933  | 41008667  | 0.08 | 5.18E-03 |
|        |         |                                                 | TSETK*HDTSLKPISVSYNPATAK | 40   | 0.991 |          | 6111050   |      |          |
| P00918 | CA2     | Carbonic anhydrase 2                            | VGSAKPGLQK*VVDVLDSIK     | 158  | 0.936 | 744560   | 3857250   | 0.19 | 2.74E-02 |
| P02545 | LMNA    | Prelamin-A/C                                    | GQVAK*LEAALGEAK          | 171  | 1     | 22987667 | 118320000 | 0.19 | 4.49E-04 |
|        |         |                                                 | IDSLSAQLSQLQK*QLAAK      | 311  | 1     | 7646000  | 26026667  | 0.29 | 6.97E-03 |
|        |         |                                                 | K*LLEGEER                | 378  | 1     |          | 8320900   |      |          |
|        |         |                                                 | LEAALGEAK*K              | 180  | 0.995 | 6680100  | 29638333  | 0.23 | 7.38E-03 |



|        |        |                                                          |                                       |     |       |           |          |       |          |
|--------|--------|----------------------------------------------------------|---------------------------------------|-----|-------|-----------|----------|-------|----------|
|        |        |                                                          | TYSAK*LDNAR                           | 270 | 1     | 10729333  | 35418333 | 0.30  | 3.33E-02 |
| P02549 | SPTA1  | Spectrin alpha chain,<br>erythrocytic 1                  | VNILTDK*SYEDPTNIQ GK                  | 79  | 1     |           | 26577000 |       |          |
| P04075 | ALDOA  | Fructose-bisphosphate aldolase<br>A                      | VDK*GVVPLAGTNGETTTQ<br>GLDGLSER       | 111 | 1     | 27479333  | 7161500  | 3.84  | 4.25E-04 |
|        |        |                                                          | YASICQQNGIVPIVEPEILPD<br>GDHDLK*R     | 200 | 1     | 27157000  | 7144767  | 3.80  | 1.30E-04 |
| P04083 | ANXA1  | Annexin A1                                               | AAMK*GLGTDEDTLIEILAS<br>R             | 128 | 1     | 1397500   | 3597767  | 0.39  | 5.46E-03 |
|        |        |                                                          | CATSK*PAFFAEK                         | 274 | 1     | 34771000  | 5508333  | 6.31  | 1.45E-03 |
| P04406 | GAPDH  | Glyceraldehyde-3-phosphate<br>dehydrogenase              | AGAHLQGGAK*R                          | 117 | 1     | 9381300   |          |       |          |
|        |        |                                                          | GALQNIIPASTGAAK*AVGK                  | 215 | 0.995 | 283630000 | 88213000 | 3.22  | 4.19E-02 |
|        |        |                                                          | TVDGPSGK*LWR                          | 194 | 1     | 42049333  | 15757333 | 2.67  | 8.38E-03 |
|        |        |                                                          | VIHDNFGIVEGLMTTVHAIT<br>ATQK*TVDGPSGK | 186 | 0.999 | 6037967   | 357165   | 16.91 | 1.75E-04 |
| P04792 | HSPB1  | Heat shock protein beta-1                                | AQLGGPEAAK*SDETA AK                   | 198 | 1     | 23705000  |          |       |          |
| P04899 | GNAS   | Guanine nucleotide-binding<br>protein G(s) subunit alpha | LLLLGAGESGK*STIVK                     | 46; | 0.973 | 1358200   |          |       |          |
| P05023 | ATP1A3 | Sodium/potassium-transporting<br>ATPase subunit alpha-3  | AAVPDAVGK*CR                          | 605 | 1     | 18617333  |          |       |          |
|        |        |                                                          | AVFQANQENLPILK*R                      | 444 | 1     | 6603633   |          |       |          |
|        |        |                                                          | CIELCCGSVK*EMR                        | 468 | 1     | 52544333  | 2296233  | 22.88 | 1.05E-02 |

|        |        |                                             |                              |      |       |           |           |       |          |
|--------|--------|---------------------------------------------|------------------------------|------|-------|-----------|-----------|-------|----------|
|        |        |                                             | DAK*ACVVHGSDLK               | 661  | 1     | 28561667  |           |       |          |
|        |        |                                             | IISANGCK*VDNSSLTGESE<br>PQTR | 212  | 1     | 11508333  |           |       |          |
| P05556 | ITGB1  | Integrin beta-1                             | SAVTTVVNPK*YEGK              | 794  | 0.986 | 7310567   |           |       |          |
| P06396 | GSN    | Gelsolin                                    | LFACSNK*IGR                  | 675; | 1     | 6679967   |           |       |          |
|        |        |                                             | TASDFITK*MDYPK               | 368; | 1     |           | 6990867   |       |          |
| P06454 | PTMA   | Prothymosin alpha                           | SDAAVDTSSSEITTK*DLK          | 15   | 0.878 | 2048167   |           |       |          |
| P06576 | ATP5B  | ATP synthase subunit beta,<br>mitochondrial | VLDSGAPIKIPVGPETLGR          | 133  | 1     | 3885700   |           |       |          |
| P06702 | S100A9 | Protein S100-A9                             | LGHPTLNQGEFK*ELVR            | 38   | 1     | 2582133   |           |       |          |
|        |        |                                             | TCK*MSQLER                   | 4    | 1     | 11086000  | 64394333  | 0.17  | 3.48E-03 |
| P07108 | DBI    | Acyl-CoA-binding protein                    | AYINK*VEELK                  | 77   | 1     | 311980000 | 9395567   | 33.21 | 1.79E-03 |
| P07195 | LDHB   | L-lactate dehydrogenase B<br>chain          | GLTSVINQKLK*                 | 310  | 0.561 | 10249850  |           |       |          |
| P07737 | PFN1   | Profilin-1                                  | TK*STGGAPTFNVTVK             | 91   | 1     | 5343800   |           |       |          |
| P08069 | IGF1R  | Insulin-like growth factor 1<br>receptor    | VAIK*TVNEAASMR               | 1033 | 1     | 2638400   |           |       |          |
| P08670 | VIM    | Vimentin                                    | ETNLDSLPLVDTHSK*R            | 439  | 1     | 95412667  | 264336667 | 0.36  | 3.53E-03 |
|        |        |                                             | FLEQQNK*ILLAELEQLKGQ<br>GK   | 129  | 1     | 11532667  | 39313667  | 0.29  | 1.00E-02 |

|        |       |                                                          |                             |     |       |           |           |      |          |
|--------|-------|----------------------------------------------------------|-----------------------------|-----|-------|-----------|-----------|------|----------|
|        |       |                                                          | ILLAELEQLK*GQGK             | 139 | 0.999 | 32149333  | 65454667  | 0.49 | 3.80E-03 |
|        |       |                                                          | K*LLEGEESR                  | 402 | 1     | 27038667  | 102537333 | 0.26 | 6.83E-03 |
|        |       |                                                          | K*VESLQEEIAFLK              | 223 | 1     | 2201700   | 13038633  | 0.17 | 4.65E-02 |
|        |       |                                                          | LREK*LQEEMLQR               | 188 | 1     | 322010000 | 792220000 | 0.41 | 2.40E-02 |
|        |       |                                                          | RQVDQLTNDK*AR               | 168 | 1     | 103283000 | 492683333 | 0.21 | 2.34E-03 |
|        |       |                                                          | RQVQSLTCEVDALK*GTNE<br>SLER | 334 | 1     | 59539667  | 163993333 | 0.36 | 2.55E-03 |
|        |       |                                                          | TLLIK*TVETR                 | 445 | 1     | 32237333  | 124916667 | 0.26 | 1.11E-03 |
| P08754 | GNAI3 | Guanine nucleotide-binding<br>protein G(k) subunit alpha | LK*IDFGAAR                  | 92  | 1     | 5316000   |           |      |          |
| P08758 | ANXA5 | Annexin A5                                               | GAGTNEK*VLTEIIASR           | 108 | 1     | 12766467  | 33655667  | 0.38 | 1.62E-02 |
|        |       |                                                          | HALK*GAGTNEK                | 101 | 1     | 15834000  | 35630000  | 0.44 | 1.43E-02 |
|        |       |                                                          | LIVALMK*PSR                 | 86  | 1     |           | 2179367   |      |          |
|        |       |                                                          | LYDAYELK*HALK               | 97  | 0.996 | 1474205   | 8769333   | 0.17 | 2.33E-02 |
| P09769 | FGR   | Tyrosine-protein kinase Fgr                              | TEDDLTFTK*GEK               | 100 | 0.992 | 8070733   |           |      |          |
|        |       |                                                          | TLKPGTMSPK*AFLEEAQV<br>MK   | 301 | 0.993 | 10635333  |           |      |          |
|        |       |                                                          | VAVK*TLKPGTMSPK             | 291 | 0.998 | 10641333  |           |      |          |

|        |        |                                                                   |                                 |     |       |           |           |       |          |  |
|--------|--------|-------------------------------------------------------------------|---------------------------------|-----|-------|-----------|-----------|-------|----------|--|
| P09936 | UCHL1  | Ubiquitin carboxyl-terminal hydrolase isozyme L1                  | CFEK*NEAIQAAHDAVAQE<br>GQCR     | 135 | 1     | 4274567   |           |       |          |  |
|        | UCHL1  | Ubiquitin carboxyl-terminal hydrolase isozyme L1                  | MQLK*PMEINPEMLNK                | 4   | 1     | 45972667  | 4225100   | 10.88 | 2.63E-02 |  |
| P11142 | HSPA2  | Heat shock 70kDa protein 2, isoform CRA_a                         | AMTK*DNNLLGK                    | 451 | 1     | 6690833   |           |       |          |  |
|        |        |                                                                   | CNEIINWLDK*NQTAEKEEF<br>EHQQK   | 583 | 1     | 153980000 | 75430000  | 2.04  | 4.64E-02 |  |
|        |        |                                                                   | ELEK*VCNPIITK                   | 601 | 1     | 77584333  | 11764400  | 6.59  | 2.22E-04 |  |
|        |        |                                                                   | GTLDPVEK*ALR                    | 319 | 1     | 21934500  |           |       |          |  |
|        |        |                                                                   | LDK*SQIHDIIVLVGGSTR             | 328 | 1     | 992625    |           |       |          |  |
|        |        |                                                                   | MVQEAEK*YKAEDEK                 | 524 | 0.999 | 326256667 | 127954667 | 2.55  | 4.69E-04 |  |
|        |        |                                                                   | NQTAEKEEFEHQK*ELEK              | 597 | 1     | 85154667  |           |       |          |  |
| P11169 | SLC2A3 | Solute carrier family 2, facilitated glucose transporter member 3 | LWGTQDVSQDIQEMK*DE<br>SAR       | 243 | 1     |           | 6226133   |       |          |  |
| P11686 | SFTPC  | Surfactant protein C isoform 1                                    | MDVGSK*EVLMESPPDYSA<br>APR      | 6   | 1     | 82885000  | 930846667 | 0.09  | 2.73E-04 |  |
| P12004 | PCNA   | Proliferating cell nuclear antigen                                | ILK*CAGNEDIITLR                 | 80  | 1     | 3214800   |           |       |          |  |
| P12109 | COL6A1 | Collagen alpha-1(VI) chain                                        | LLLFSDGNSQGATPAAIEK*<br>AVQEAQR | 957 | 1     |           | 6629500   |       |          |  |
| P12268 | IMPDH2 | Inosine-5'-monophosphate dehydrogenase 2                          | GK*LPIVNEDELVAIIAR              | 208 | 1     | 25047333  | 3244533   | 7.72  | 6.51E-04 |  |
|        |        |                                                                   | K*GKLPIVNEDELVAIIAR             | 206 | 0.859 | 14432667  | 2532100   | 5.70  | 3.61E-03 |  |

|        |          |                                            |                              |     |       |           |          |      |          |
|--------|----------|--------------------------------------------|------------------------------|-----|-------|-----------|----------|------|----------|
| P13010 | XRCC5    | X-ray repair cross-complementing protein 5 | LGGHGSPFPLK*GITEQQK          | 195 | 0.999 | 7101433   |          |      |          |
| P13584 | CYP4B1   | Cytochrome P450 4B1                        | DEDDIK*LSDADLR               | 299 | 1     |           | 47775333 |      |          |
|        |          |                                            | QLSK*PVTFVDGR                | 389 | 1     |           | 4433367  |      |          |
| P14618 | PKM      | Pyruvate kinase PKM                        | IISK*IENHEGVR                | 270 | 1     | 1450950   |          |      |          |
| P14735 | IDE      | Insulin-degrading enzyme                   | EVNAVDSEHEK*NVMNDA<br>WR     | 192 | 1     | 3216700   | 55274333 | 0.06 | 3.90E-02 |
| P15924 | DSP      | Desmoplakin                                | FGEK*VTQLTDR                 | 859 | 1     | 6918233   |          |      |          |
| P16152 | CBR1     | Carbonyl reductase [NADPH] 1               | ALK*SCSPELQQK                | 148 | 1     | 3773633   |          |      |          |
| P16157 | ANK1     | Ankyrin-1                                  | LVK*PQKLSTPPPLAEEEEGL<br>ASR | 955 | 0.5   |           | 12458367 |      |          |
|        |          |                                            | LVKPQK*LSTPPPLAEEEEGL<br>ASR | 958 | 0.5   |           | 12458367 |      |          |
| P16403 | HIST1H1C | Histone H1.2                               | SETAPAAPAAAPPAEK*AP<br>VK    | 17  | 0.5   | 2421350   | 7058767  | 0.34 | 2.27E-02 |
|        |          |                                            | SETAPAAPAAAPPAEKAPV<br>K*    | 21  | 0.5   | 2421350   | 7058767  | 0.34 | 2.27E-02 |
|        |          |                                            | SLVSK*GTLVQTK                | 93  | 1     |           | 2534700  |      |          |
| P17302 | GJA1     | Gap junction alpha-1 protein               | GK*SDPYHATSGALSPAK           | 243 | 1     | 63351000  |          |      |          |
|        |          |                                            | SDPYHATSGALSPAK*DCG<br>SQK   | 258 | 1     | 187933333 | 22145333 | 8.49 | 5.56E-04 |
|        |          |                                            | VAQTDGVNVDMLHK*QIEIK         | 128 | 1     | 146180000 | 28758667 | 5.08 | 1.41E-02 |

|        |            |                                                     |                     |      |       |         |           |      |          |
|--------|------------|-----------------------------------------------------|---------------------|------|-------|---------|-----------|------|----------|
| P20700 | LMNB1      | Lamin-B1                                            | IESLSSQLSNLQK*ESR   | 312  | 1     | 5992067 |           |      |          |
|        |            |                                                     | K*QLADETLLK         | 182  | 1     | 5773150 |           |      |          |
| P21796 | VDAC1      | Voltage-dependent anion-selective channel protein 1 | AVPPTYADLGK*SAR     | 12   | 1     | 1752300 |           |      |          |
| P22626 | HNRNPA2 B1 | Heterogeneous nuclear ribonucleoproteins A2/B1      | LTDCVVMRDPASK*R     | 59   | 1     | 6247500 |           |      |          |
| P23396 | RPS3       | 40S ribosomal protein S3                            | K*PLPDHVSIVEPK      | 202  | 1     | 5864067 |           |      |          |
| P25685 | DNAJB1     | DnaJ homolog subfamily B member 1                   | GASDEEIK*R          | 21   | 1     | 8437400 |           |      |          |
| P25705 | ATP5A1     | ATP synthase subunit alpha, mitochondrial           | VGLK*APGIIPR        | 175  | 1     | 2023067 |           |      |          |
| P26038 | MSN        | Moesin                                              | SGYLAGDK*LLPQR      | 151  | 1     | 6165033 |           |      |          |
|        |            |                                                     | VLEQHK*LNK          | 162  | 0.999 | 9876950 | 107870333 | 0.09 | 1.38E-02 |
|        |            |                                                     | YGDFNK*EVHK         | 139  | 1     | 8246533 | 59866333  | 0.14 | 6.26E-03 |
| P26447 | S100A4     | Protein S100-A4                                     | ELPSFLGK*R          | 48   | 1     | 9840867 | 76290333  | 0.13 | 1.57E-02 |
| P27708 | CAD        | CAD protein                                         | DDQLK*VIECNVR       | 1211 | 1     | 2219300 |           |      |          |
|        |            |                                                     | LGPGK*GEVRPELGSR    | 1657 | 1     | 5368733 |           |      |          |
|        |            |                                                     | LSSFVTK*GYR         | 1411 | 1     | 4507267 |           |      |          |
| P28838 | LAP3       | Cytosol aminopeptidase                              | AAGIDEQENWHEGK*ENIR | 118  | 1     | 4237050 |           |      |          |

|        |         |                                                |                              |     |       |           |          |      |          |
|--------|---------|------------------------------------------------|------------------------------|-----|-------|-----------|----------|------|----------|
| P29034 | S100A2  | Protein S100-A2                                | ELLHK*ELPSFVGEK              | 41  | 1     | 21743333  |          |      |          |
|        |         |                                                | ELPSFVGEK*VDEEGLK            | 50  | 1     | 70906667  |          |      |          |
| P30050 | RPL12   | 60S ribosomal protein L12                      | ELSGTIK*EILGTAQSVGCN<br>VDGR | 130 | 1     | 3166167   |          |      |          |
| P30876 | POLR2B  | DNA-directed RNA polymerase<br>II subunit RPB2 | EVLQK*EMLPHVGVSDFCE<br>TK    | 345 | 1     | 3576033   |          |      |          |
|        |         |                                                | HAIYDK*LDDDGLIAPGVR          | 847 | 1     | 7363967   |          |      |          |
|        |         |                                                | HGQK*GTCGIQYR                | 942 | 1     | 4001150   |          |      |          |
|        |         |                                                | TFIGK*IPIMLR                 | 151 | 1     | 14207100  |          |      |          |
|        |         |                                                | VSANK*GEIGDATPFNDV<br>NVQK   | 993 | 1     | 8308333   |          |      |          |
|        |         |                                                | YSLATGNWGDQK*K               | 457 | 0.964 | 10849633  |          |      |          |
| P31949 | S100A11 | Protein S100-A11                               | AK*ISSPTETER                 | 3   | 1     | 204976667 | 43570667 | 4.70 | 1.66E-02 |
|        |         |                                                | NQK*DPGVLDR                  | 55  | 1     | 74838000  | 20146333 | 3.71 | 1.25E-03 |
| P32320 | CDA     | Cytidine deaminase                             | IFK*GCNIENACYPLGICAE<br>R    | 51  | 1     | 45002333  | 6573533  | 6.85 | 3.02E-04 |
| P33527 | ABCC1   | Multidrug resistance-associated<br>protein 1   | RPVK*DGGGTNSITVR             | 636 | 1     | 36377333  |          |      |          |
|        |         |                                                | TYQVAHMKSK*                  | 498 | 0.713 | 11079067  |          |      |          |
|        |         |                                                | TYQVAHMK*SK                  | 496 | 1     | 68751667  |          |      |          |

|        |         |                                                              |                               |      |       |           |          |       |          |
|--------|---------|--------------------------------------------------------------|-------------------------------|------|-------|-----------|----------|-------|----------|
| P35580 | MYH10   | Myosin-10                                                    | QLLQANPILESFGNAK*TVK          | 232  | 0.85  | 7519567   | 18467000 | 0.41  | 2.88E-03 |
| P36382 | GJA5    | Gap junction alpha-5 protein                                 | GSGSYEYPVAEK*AELSCW<br>EEGNGR | 130  | 1     |           | 6036133  |       |          |
| P38606 | ATP6V1A | V-type proton ATPase catalytic subunit A                     | AK*EILQEEEDLAEIVQLVG<br>K     | 480  | 1     | 2227567   |          |       |          |
|        |         |                                                              | IK*SDYAQLLEDMQNAFR            | 598  | 1     | 481775    |          |       |          |
| P47929 | LGALS7  | Galectin-7                                                   | SNVPHK*SSLPEGIRPGTVL<br>R     | 7    | 1     | 12726333  |          |       |          |
| P49327 | FASN    | Fatty acid synthase                                          | VVVQVLAEEPEAVLKGAK*           | 1869 | 0.582 | 4248267   |          |       |          |
|        |         |                                                              | VVVQVLAEEPEAVLK*GAK<br>PK     | 1866 | 0.982 | 182153333 | 35315667 | 5.16  | 6.54E-05 |
| P51572 | BCAP31  | B-cell receptor-associated protein 31                        | K*QAESASEAAK                  | 138  | 1     | 1668200   |          |       |          |
| P51674 | GPM6A   | Neuronal membrane glycoprotein M6-a                          | SK*EEQELHDIHSTR               | 257  | 1     |           | 15875667 |       |          |
| P51970 | NDUFA8  | NADH dehydrogenase [ubiquinone] 1 alpha subcomplex subunit 8 | KQQAK*FDECVLDK                | 106  | 1     | 101315000 |          |       |          |
| P52209 | PGD     | 6-phosphogluconate dehydrogenase, decarboxylating            | IK*DAFDRNPELQNLDDDF<br>FK     | 377  | 1     | 15993000  | 967870   | 16.52 | 1.66E-02 |
|        |         |                                                              | VVGAQSLK*EMVSK                | 59   | 1     | 36890667  | 13871767 | 2.66  | 5.07E-03 |
| P52272 | HNRNPM  | Heterogeneous nuclear ribonucleoprotein M                    | RGEIIAK*QGGGGGGGSSVP<br>GIER  | 388  | 1     | 44328333  | 2930050  | 15.13 | 4.82E-03 |
| P52895 | AKR1C2  | Aldo-keto reductase family 1 member C2                       | LLEMILNK*PGLK                 | 179  | 0.998 | 24153000  |          |       |          |
| P53621 | COPA    | Coatomer subunit alpha                                       | GFFEGTIASKGK*                 | 827  | 0.625 | 2039500   | 8681750  | 0.23  | 1.19E-02 |



|        |         |                                           |                             |      |       |          |           |      |          |
|--------|---------|-------------------------------------------|-----------------------------|------|-------|----------|-----------|------|----------|
|        |         |                                           | GFFEGTIASK*GK               | 825  | 0.803 | 6390333  |           |      |          |
| P55011 | SLC12A2 | Solute carrier family 12 member 2         | GPIVPLNVADQK*LLEASTQ<br>FQK | 1007 | 1     | 2620850  | 826250    | 3.17 | 5.26E-04 |
| P55072 | VCP     | Transitional endoplasmic reticulum ATPase | ASGADSK*GDDLSTAILK          | 8    | 1     | 22679667 | 78176667  | 0.29 | 1.23E-04 |
|        |         |                                           | ETVVEVPQVTWEDIGGLED<br>VK*R | 486  | 1     | 4555400  | 1937933   | 2.35 | 1.54E-02 |
|        |         |                                           | GDDLSTAILK*QK               | 18   | 0.896 |          | 18149667  |      |          |
|        |         |                                           | KSPVAK*DVDLEFLAK            | 668  | 1     | 4631667  | 168396667 | 0.03 | 2.07E-04 |
|        |         |                                           | LDQLIYIPLPEK*SR             | 651  | 1     | 836925   | 9470867   | 0.09 | 3.90E-02 |
|        |         |                                           | QLAQIK*EMVELPLR             | 217  | 1     | 3167100  |           |      |          |
|        |         |                                           | VAILK*ANLR                  | 658  | 1     | 36725000 | 99697667  | 0.37 | 4.95E-02 |
|        |         |                                           | VINQILTEMDGMSTK*K           | 614  | 0.5   | 13202150 |           |      |          |
| P56856 | CLDN18  | Claudin-18                                | K*IYDGGAR                   | 239  | 1     |          | 18071600  |      |          |
|        |         |                                           | TEDEVQSYPSK*HDYV            | 257  | 1     | 10223467 | 207346667 | 0.05 | 2.03E-04 |
| P57735 | RAB25   | Ras-related protein Rab-25                | VVLIGESGVGK*TNLLSR          | 25   | 1     | 2687900  |           |      |          |
| P58107 | EPPK1   | Epiplakin                                 | DLAQGTK*TLQEVTMDSV<br>KR    | 2739 | 1     | 4445250  |           |      |          |
|        |         |                                           | TLQEVTMDSVK*R               | 2751 | 1     | 4555567  |           |      |          |

|        |        |                                                              |                                 |     |       |           |           |      |          |  |
|--------|--------|--------------------------------------------------------------|---------------------------------|-----|-------|-----------|-----------|------|----------|--|
| P60174 | TPI1   | Triosephosphate isomerase                                    | VAHALAEGLGVIACIGEK*<br>L<br>DER | 168 | 1     | 1307000   |           |      |          |  |
| P61088 | UBE2N  | Ubiquitin-conjugating enzyme<br>E2 N                         | DK*WSPALQIR                     | 94  | 1     | 7546600   | 52940333  | 0.14 | 4.12E-02 |  |
|        |        |                                                              | ICLDILK*DK                      | 92  | 0.999 | 357116667 | #####     | 0.26 | 2.52E-04 |  |
| P62191 | PSMC1  | 26S protease regulatory subunit<br>4                         | VAEEHAPSIVFIDEIDAIGTK<br>*R     | 293 | 1     | 9735900   |           |      |          |  |
| P62249 | RPS16  | 40S ribosomal protein S16                                    | LLEPVLLL GK*ER                  | 60  | 1     | 1385957   |           |      |          |  |
| P62258 | YWHAE  | 14-3-3 protein epsilon                                       | LICCDILDVLDK*HLIPAANT<br>GESK   | 106 | 1     | 3620150   | 8381567   | 0.43 | 2.94E-02 |  |
| P62879 | GNB2   | Guanine nucleotide-binding<br>protein G(I)/G(S)/G(T) subunit | K*ACGDSTLTQITAGLDPV<br>GR       | 23  | 1     | 2867800   | 23105667  | 0.12 | 2.99E-02 |  |
| P62913 | RPL11  | 60S ribosomal protein L11<br>OS=Homo sapiens                 | AAK*VLEQLTGQTPVFSK              | 38  | 1     | 5761600   |           |      |          |  |
|        |        |                                                              | VLEQLTGQTPVFSK*AR               | 52  | 1     | 15306667  |           |      |          |  |
| P62987 | HEL112 | Epididymis luminal protein 112                               | IQDK*EGIPPDQQR                  | 33  | 1     | 40500333  | 13950000  | 2.90 | 3.75E-04 |  |
|        |        |                                                              | MQIFVK*TLTGK                    | 6   | 1     | 56149000  | 207173333 | 0.27 | 5.07E-03 |  |
|        |        |                                                              | TITLEVEPSDTIENVK*AK             | 27  | 0.98  | 265603333 | 69675000  | 3.81 | 4.53E-05 |  |
|        |        |                                                              | TLTGK*TITLEVEPSDTIENV<br>KAK    | 11  | 1     | #####     | #####     | 0.50 | 1.28E-02 |  |
| P63218 | GNG5   | Guanine nucleotide-binding<br>protein G(I)/G(S)/G(O) subunit | SGSSSVAAMKK*                    | 12  | 0.556 |           | 4508700   |      |          |  |
| P68032 | ACTA2  | Actin, alpha 2, smooth muscle,<br>aorta                      | VAPEEHPTLLTEAPLNPK*A<br>NR      | 115 | 1     | 1822000   | 3951100   | 0.46 | 2.23E-02 |  |

|        |        |                                                   |                                   |      |   |           |          |       |          |  |
|--------|--------|---------------------------------------------------|-----------------------------------|------|---|-----------|----------|-------|----------|--|
| P68104 | EEF1A1 | Elongation factor 1-alpha                         | FEK*EAAEMGK                       | 44   | 1 | 17672667  |          |       |          |  |
|        |        |                                                   | KLEDGPK*FLK                       | 392  | 1 | 25883333  |          |       |          |  |
|        |        |                                                   | VETGVLK*PGMVVTFAPVN<br>VTTEVK     | 273  | 1 | 25590333  |          |       |          |  |
| P68363 | TUBA1B | Tubulin alpha-1B chain                            | AYHEQLSVAEITNACFEPANQMVK*CDPR     | 304  | 1 | 16050333  |          |       |          |  |
|        |        |                                                   | DVNAAIATIK*TK*R                   | 338  | 1 | 209013333 | 22301333 | 9.37  | 1.68E-02 |  |
|        |        |                                                   | DVNAAIATIK*TK*R                   | 336  | 1 | 282603333 | 12912867 | 21.89 | 2.62E-02 |  |
|        |        |                                                   | GDVVPK*DVNAAIATIK                 | 326  | 1 | 47385333  | 9355267  | 5.07  | 8.93E-03 |  |
|        |        |                                                   | QLFHPEQLITGK*EDAANN<br>YAR        | 96   | 1 | 13905000  | 2932533  | 4.74  | 1.04E-03 |  |
|        |        |                                                   | TIGGGDDSFNTFFSETGAG<br>K*HVPR     | 60   | 1 | 29265000  | 5874100  | 4.98  | 1.15E-02 |  |
| P68371 | TUBB2A | Tubulin beta-2A chain                             | K*LAVNMVPFPR                      | 252  | 1 | 68115667  |          |       |          |  |
|        |        |                                                   | MSMK*EVDEQMLNVQNK                 | 324  | 1 | 39707667  | 11285733 | 3.52  | 4.20E-04 |  |
|        |        |                                                   | NSSYFVEWIPNNVK*TAVC<br>DIPPR      | 350  | 1 | 3353800   |          |       |          |  |
|        |        |                                                   | TLK*LTTPTYGDLNHLVSAT<br>MSGVTTCLR | 216  | 1 | 14417333  |          |       |          |  |
| P78527 | PRKDC  | DNA-dependent protein kinase<br>catalytic subunit | K*GGSWIQEINVAEK                   | 4023 | 1 | 9697100   |          |       |          |  |
|        |        |                                                   | LAAVVSACK*QLHR                    | 1456 | 1 | 2935033   |          |       |          |  |

|        |        |                                                       |                                     |      |       |          |          |      |          |
|--------|--------|-------------------------------------------------------|-------------------------------------|------|-------|----------|----------|------|----------|
| P83916 | CBX1   | Chromobox protein homolog 1                           | NSDEADLVPAK*EANVK                   | 150  | 0.829 | 1524210  |          |      |          |
| P98172 | EFNB1  | Ephrin-B1                                             | AAALSLSTLASPK*GGSGT<br>AGTEPSDIIPLR | 289  | 1     | 8524167  |          |      |          |
| Q01105 | SET    | Protein SET                                           | EFHNLNESGDPSSK*STEIK                | 167  | 0.99  | 3463767  |          |      |          |
|        |        |                                                       | VLSK*EFHNLNESGDPSSK                 | 154  | 1     | 9531500  |          |      |          |
| Q01118 | SCN7A  | Sodium channel protein type 7 subunit alpha           | ELQEGNETDEAK*TIQIEMK                | 432  | 1     |          | 10371500 |      |          |
|        |        |                                                       | FQQTGK*ELQEGNETDEAK                 | 420  | 1     | 3332633  | 40679000 | 0.08 | 2.89E-03 |
|        |        |                                                       | K*QEAVSATIIQR                       | 1623 | 1     |          | 4159100  |      |          |
| Q01650 | SLC7A5 | Large neutral amino acids transporter small subunit 1 | ALAAPAAEEK*EEAR                     | 19   | 1     | 9955433  |          |      |          |
| Q01844 | EWSR1  | RNA-binding protein EWS                               | GDATVSYEDPPTAK*AAVE<br>WFDGK        | 424  | 1     | 3285300  |          |      |          |
| Q02543 | RPL18A | 60S ribosomal protein L18a                            | VEEIAASK*CR                         | 136  | 1     | 7088100  | 3118167  | 2.27 | 3.31E-03 |
| Q04828 | AKR1C2 | Aldo-keto reductase family 1 member C2                | EEPWVDPNSPVLLEDPLC<br>ALAK*K        | 246  | 0.876 | 39880333 |          |      |          |
|        |        |                                                       | GVVVLAK*SYNEQR                      | 270  | 1     | 24766567 |          |      |          |
|        |        |                                                       | LNDGHFMPVLGFGTYAPA<br>EVPK*SK       | 31   | 0.738 | 5498150  |          |      |          |
|        |        |                                                       | MDSK*YQCVK                          | 4    | 1     | 3861500  |          |      |          |
|        |        |                                                       | QLEMILNK*PGLK                       | 179  | 0.999 | 13998967 |          |      |          |

|        |          |                                                         |                                   |      |       |          |          |      |          |
|--------|----------|---------------------------------------------------------|-----------------------------------|------|-------|----------|----------|------|----------|
|        |          |                                                         | SK*ALEATK                         | 33   | 1     | 37584750 |          |      |          |
|        |          |                                                         | YQCVK*LNDGHFMPVLGF<br>GTYPAPAEVPK | 9    | 1     | 16470000 |          |      |          |
| Q05682 | CALD1    | Caldesmon                                               | SAK*PTKPAASDLPVPAEG<br>VR         | 693  | 0.964 | 2321800  |          |      |          |
| Q09666 | AHNAK    | Neuroblast differentiation-<br>associated protein AHNAK | VESEIK*VPDVELK                    | 848  | 1     |          | 5705933  |      |          |
|        |          |                                                         | VPDVDIK*GPK                       | 1360 | 0.993 | 4504750  | 38279000 | 0.12 | 9.85E-03 |
| Q0JRZ9 | FCHO2    | F-BAR domain only protein 2                             | ADFEQK*MTETAQK                    | 194  | 1     | 1981667  |          |      |          |
| Q12846 | STX4     | Syntaxin-4                                              | LGNK*VQELEK                       | 58   | 1     | 7973833  |          |      |          |
| Q12965 | MYO1E    | Unconventional myosin-1e                                | DIILQSNPLLEAFGNAK*TV<br>R         | 160  | 1     | 1250067  |          |      |          |
| Q13228 | SELENBP1 | Selenium-binding protein 1                              | TK*LVLPSLISSR                     | 93   | 1     | 8129900  | 43616000 | 0.19 | 2.76E-04 |
| Q13393 | PLD1     | Phospholipase D1                                        | MPWHDIASAVHGK*AAR                 | 688  | 1     | 11002833 |          |      |          |
| Q13571 | LAPTM5   | Lysosomal-associated<br>transmembrane protein 5         | MLQK*VVLPSYEEALSLPSK              | 233  | 1     | 3291467  | 10645333 | 0.31 | 2.48E-02 |
| Q13619 | CUL4A    | Cullin-4A                                               | LLVGK*SASVDAEK                    | 465  | 1     | 2315400  |          |      |          |
|        |          |                                                         | TLQSLACGK*AR                      | 635  | 1     | 4478633  |          |      |          |
| Q13740 | ALCAM    | CD166 antigen                                           | DLGNMEENK*K                       | 572  | 0.508 | 8123900  |          |      |          |
| Q14126 | DSG2     | Desmoglein-2                                            | FLDDLGLK*FK                       | 832  | 0.988 | 15528333 |          |      |          |

|        |         |                                                  |                                     |     |       |           |          |      |          |
|--------|---------|--------------------------------------------------|-------------------------------------|-----|-------|-----------|----------|------|----------|
|        |         |                                                  | GSSSASIVK*GQHEMSEMD<br>GR           | 706 | 1     | 15502333  |          |      |          |
|        |         |                                                  | SLQEANA EK*VTQEIVTER                | 901 | 1     | 3085767   |          |      |          |
| Q15012 | LAPTM4A | Lysosomal-associated<br>transmembrane protein 4A | MPEK*EPPPPYLPA                      | 224 | 1     | 22777667  | 10513000 | 2.17 | 1.21E-04 |
| Q15080 | NCF4    | Neutrophil cytosol factor 4                      | VYVGVK*QEIAEMR                      | 98  | 1     | 2276600   |          |      |          |
| Q15365 | PCBP1   | Poly(rC)-binding protein 1                       | QMSGAIK*IANPVEGSSG<br>R             | 314 | 1     | 43432333  | 6048600  | 7.18 | 5.73E-05 |
| Q15366 | PCBP2   | Poly(rC)-binding protein 2                       | LVVPASQCGSLIGKGGCK*                 | 119 | 0.654 | 7953000   | 1729250  | 4.60 | 2.22E-03 |
|        |         |                                                  | QMSGAIK*IANPVEGSTD<br>R             | 322 | 1     | 6048000   |          |      |          |
| Q15645 | TRIP13  | Pachytene checkpoint protein 2<br>homolog        | VVNAVLTQIDQIK*R                     | 288 | 1     | 6287167   |          |      |          |
| Q15742 | NAB2    | NGFI-A-binding protein 2                         | SPLELGEK*LSPLPGGPGA<br>GDPR         | 169 | 1     | 7001633   |          |      |          |
|        |         |                                                  | SVGHIFEMDDNDSQK*EEEI<br>R           | 291 | 1     | 2317733   |          |      |          |
| Q15758 | SLC1A5  | Neutral amino acid transporter<br>B(0)           | SELPLDPLVPTEEGNPLL<br>K*HYR         | 522 | 1     | 11790767  |          |      |          |
|        |         |                                                  | STEPELIQVK*SELPLDPLP<br>VPTEEGNPLLK | 502 | 1     | 27506000  | 3823467  | 7.19 | 3.69E-03 |
| Q16186 | ADRM1   | Proteasomal ubiquitin receptor<br>ADRM1          | MSLK*GTTVTPDKR                      | 34  | 1     | 143170000 | 63045000 | 2.27 | 1.24E-02 |
| Q32Q12 | NME1    | Nucleoside diphosphate kinase<br>A               | TFIAIK*PDGVQR                       | 37  | 1     | 28956667  | 6122550  | 4.73 | 2.02E-02 |
|        |         |                                                  | VMLGETNPADSK*PGTIR                  | 125 | 1     | 30203333  | 4233800  | 7.13 | 4.03E-03 |

|        |         |                                                              |                        |      |       |           |          |      |          |
|--------|---------|--------------------------------------------------------------|------------------------|------|-------|-----------|----------|------|----------|
| Q3ZTS7 | ANKRD13 | Ankyrin repeat domain 13, isoform CRA_b                      | LTLDLMK*PK             | 217  | 0.915 | 37975000  | 76818667 | 0.49 | 4.75E-03 |
| Q4LE27 | ABCA3   | ABCA3 variant protein                                        | AVAGK*EEEDSDPEKALR     | 507  | 1     | 3561200   | 15788000 | 0.23 | 2.11E-02 |
|        |         |                                                              | AVAGKEEEDSDPEK*ALR     | 516  | 1     | 3561200   | 17928667 | 0.20 | 3.59E-02 |
| Q4LE36 | ACLY    | ACLY variant protein                                         | SMGFIGHYLDQK*R         | 1113 | 1     | 2589850   |          |      |          |
| Q4LE69 | PIK4CA  | PIK4CA variant protein                                       | ITNVSAIK*PYPK          | 1768 | 0.995 | 2949500   |          |      |          |
| Q4W4Y1 | DRIP4   | Dopamine receptor interacting protein 4                      | MK*QSNNEANLR           | 640  | 1     | 27086333  | 9787567  | 2.77 | 6.55E-03 |
| Q53EM5 | TKT     | Transketolase                                                | ESWHGK*PLPK            | 260  | 1     | 53386333  |          |      |          |
|        |         |                                                              | GITGVEDK*ESWHGKPLPK    | 254  | 1     | 100778000 |          |      |          |
|        |         |                                                              | K*KILATPPQEDAPSVDIANIR | 282  | 0.5   | 96477000  |          |      |          |
|        |         |                                                              | K*ILATPPQEDAPSVDIANIR  | 283  | 1     | 111254000 |          |      |          |
|        |         |                                                              | K*ISSDLDGHPVPK         | 102  | 1     | 32103667  |          |      |          |
| Q53F64 | HNRNPAB | Heterogeneous nuclear ribonucleoprotein AB isoform a variant | MFVGGLSWDTSKK*         | 84   | 0.548 | 9201367   |          |      |          |
|        |         |                                                              | MFVGGLSWDTSK*K         | 83   | 0.5   | 4167550   |          |      |          |
| Q53G42 | DCPS    | mRNA decapping enzyme variant                                | QLNDVK*TTVVYPATEK      | 128  | 1     | 1612400   |          |      |          |

|        |        |                                                                                                         |                                  |     |       |           |           |        |          |
|--------|--------|---------------------------------------------------------------------------------------------------------|----------------------------------|-----|-------|-----------|-----------|--------|----------|
| Q53GL6 | RALY   | RNA binding protein<br>(Autoantigenic, hnRNP-<br>associated with lethal yellow)<br>long isoform variant | VFIGNLNTALVK*K                   | 34  | 0.843 | 7092933   |           |        |          |
| Q53GY0 | PLS3   | Plastin-3                                                                                               | VYALPEDLVEVKPK*                  | 613 | 0.565 | 5461400   | 1444963   | 3.78   | 1.61E-02 |
| Q549N5 | SRPRB  | Signal recognition particle<br>receptor beta subunit                                                    | SAK*LIQQQLEK                     | 191 | 1     | 4177867   |           |        |          |
| Q562R1 | ACTBL2 | Beta-actin-like protein 2                                                                               | IK*IIAPPERK                      | 329 | 1     | 204406667 | 21053667  | 9.71   | 5.56E-04 |
| Q59E85 | CAV1   | Caveolin                                                                                                | AMADELSEK*QVYDAHTK               | 78  | 1     | 49055000  | 213376667 | 0.23   | 2.17E-02 |
|        |        |                                                                                                         | EIDLVNRDPK*HLNDDVVK              | 96  | 1     |           | 15908667  |        |          |
|        |        |                                                                                                         | EQGNIYKPNNK*AMADELSEK            | 69  | 0.986 | 24800000  | 106507333 | 0.23   | 1.88E-02 |
|        |        |                                                                                                         | EQGNIYK*PNNK                     | 65  | 0.999 | 8902500   | 72841000  | 0.12   | 1.66E-02 |
|        |        |                                                                                                         | QVYDAHTK*EIDLVNR                 | 86  | 1     | 17464667  | 87394667  | 0.20   | 1.68E-02 |
| Q59EG8 | PSMD2  | Proteasome 26S non-ATPase<br>subunit 2 variant                                                          | EWQELDDAEK*VQR                   | 183 | 1     | 30879667  |           |        |          |
| Q59EV7 | SLC6A8 | Transporter                                                                                             | GPLIAPGPDGAPAK*GDGP<br>VGLGTPGGR | 52  | 1     | 1941450   |           |        |          |
| Q59GM9 | PYGM   | Alpha-1,4 glucan phosphorylase                                                                          | VLYPNDNFFEGK*ELR                 | 312 | 1     | 3498133   |           |        |          |
| Q59GX2 | SLC2A1 | Solute carrier family 2<br>(Facilitated glucose transporter), R<br>member 1 variant                     | LRGTADVTHDLQEMK*EES              | 270 | 1     | 321283333 | 2896200   | 110.93 | 1.17E-03 |
|        |        |                                                                                                         | QGGASQSDK*TPEELFHPL<br>GADSQV    | 502 | 1     | 48302333  |           |        |          |



|        |          |                                                                     |                         |     |       |          |          |      |          |  |
|--------|----------|---------------------------------------------------------------------|-------------------------|-----|-------|----------|----------|------|----------|--|
| Q59H06 | TAP2     | Transporter 2, ATP-binding cassette, sub-family B isoform 1 variant | QDLGFFQETK*TGELNSR      | 246 | 1     | 15477667 |          |      |          |  |
| Q5H9Q6 | IMPDH    | Inosine-5'-monophosphate dehydrogenase                              | GK*LPIVNDCCDELVAIIAR    | 283 | 1     | 11673933 | 2667533  | 4.38 | 7.31E-03 |  |
|        |          |                                                                     | K*GKLPVNDCCDELVAIIAR    | 281 | 0.538 | 8916400  | 1489603  | 5.99 | 2.66E-02 |  |
| Q5JSH3 | WDR44    | WD repeat-containing protein 44                                     | ITGIEPLPGENK*ILVTSNDSR  | 756 | 1     | 10931867 |          |      |          |  |
| Q5JTV8 | TOR1AIP1 | Torsin-1A-interacting protein 1                                     | MQNDSILK*SELGNQSPSTSSR  | 308 | 1     |          | 5729200  |      |          |  |
| Q5TDH0 | DDI2     | Protein DDI1 homolog 2                                              | DMLLANPHELSELLK*ER      | 153 | 1     | 6049800  | 1885500  | 3.21 | 6.04E-03 |  |
|        |          |                                                                     | WAGIAK*GVGTQK           | 283 | 0.997 | 18009000 | 4850167  | 3.71 | 2.45E-02 |  |
| Q5VVQ6 | YOD1     | Ubiquitin thioesterase OTU1                                         | FGEDAGYTK*R             | 257 | 1     |          | 43418333 |      |          |  |
| Q5VWC4 | PSMD4    | 26S proteasome non-ATPase regulatory subunit 4                      | ILSK*LHTVQPK            | 74  | 1     | 28412667 | 5504733  | 5.16 | 1.79E-02 |  |
| Q5VXU3 | CHIC1    | Cysteine-rich hydrophobic domain-containing protein 1               | SIQK*LIEWENNR           | 176 | 1     | 18900000 |          |      |          |  |
| Q6IA69 | NADSYN1  | Glutamine-dependent NAD(+) synthetase                               | HK*MTTLTPAYHAENYSPE DNR | 649 | 1     | 3991867  |          |      |          |  |
| Q6IBN1 | HNRPK    | HNRPK protein                                                       | HESGASIK*IDEPLEGSEDR    | 422 | 1     |          | 2469600  |      |          |  |
|        |          |                                                                     | ILLQSK*NAGAVIGK         | 52  | 1     | 4639700  |          |      |          |  |
|        |          |                                                                     | LLIHQSLAGGIIGVK*GAK     | 163 | 0.843 | 8439633  |          |      |          |  |
| Q6NX51 | EXOC4    | Exocyst complex component 4                                         | QVPQK*LEQCMASK          | 140 | 1     | 3258167  | 1228630  | 2.65 | 1.85E-02 |  |

|        |          |                                            |                              |      |       |           |           |       |          |
|--------|----------|--------------------------------------------|------------------------------|------|-------|-----------|-----------|-------|----------|
| Q6NZI2 | PTRF     | Polymerase I and transcript release factor | AHATTSNTVSK*LLEK             | 109  | 1     | 63869333  | 235120000 | 0.27  | 5.94E-03 |
|        |          |                                            | K*LEVNEAELLR                 | 137  | 1     | 850775    | 24746000  | 0.03  | 7.81E-03 |
|        |          |                                            | LGK*AHATTSNTVSK              | 98   | 1     | 34534333  | 162360000 | 0.21  | 1.44E-02 |
|        |          |                                            | QAEMEGAVQSIQGELSK*L<br>GK    | 95   | 0.989 | 4869600   | 39774333  | 0.12  | 1.12E-02 |
|        |          |                                            | SLK*ESEALPEK                 | 173  | 1     | 4153000   | 39582000  | 0.10  | 1.28E-02 |
|        |          |                                            | VMIYQDEVK*LPAK               | 161  | 0.999 | 15963367  | 127745667 | 0.12  | 3.11E-03 |
|        |          |                                            | VSVNVK*TVR                   | 122  | 1     | 1538500   | 13701867  | 0.11  | 4.54E-02 |
| Q6P2H0 | DTX2     | DTX2 protein                               | VQQALAGATPK*                 | 19   | 1     | 202566667 | 5718400   | 35.42 | 2.44E-04 |
| Q6P2Q9 | PRPF8    | Pre-mRNA-processing-splicing factor 8      | DLILADYGKK*                  | 1994 | 0.567 | 3791067   |           |       |          |
|        |          |                                            | DLILADYGK*K                  | 1993 | 0.5   | 2859700   |           |       |          |
| Q6ZN40 | TPM1     | Tropomyosin 1 (Alpha), isoform CRA_a       | AELSEGK*CAELEEEELK           | 231  | 1     |           | 2491600   |       |          |
| Q6ZRV2 | FAM83H   | Protein FAM83H                             | EGPEEPGLAK*QDSFR             | 664  | 1     | 5626633   |           |       |          |
|        |          |                                            | VPAAFPTK*VPVPGPGSGG<br>NGPER | 639  | 1     | 4468067   |           |       |          |
| Q71DI3 | HIST1H3A | Histone H3.1                               | K*SAPATGGVK                  | 28   | 1     | 8967200   | 4219000   | 2.13  | 4.43E-03 |
|        |          |                                            | YQK*STELLIR                  | 57   | 1     | 41441333  | 14149033  | 2.93  | 2.22E-02 |

|        |                    |                                                     |                               |     |       |           |           |       |          |
|--------|--------------------|-----------------------------------------------------|-------------------------------|-----|-------|-----------|-----------|-------|----------|
| Q7Z3R8 | DKFZp686<br>D10173 | DNA-directed RNA polymerase<br>subunit beta         | LSYISALGMMTRISSQFEK*          | 461 | 1     | 15817000  |           |       |          |
| Q86YT6 | MIB1               | E3 ubiquitin-protein ligase MIB1                    | DKDNTNVNADVQK*LQQQ<br>LQDIK   | 949 | 1     | 11359100  | 3042550   | 3.73  | 7.08E-03 |
|        |                    |                                                     | GHGEWAEAMLPTLGK*VGR           | 368 | 1     | 2975367   |           |       |          |
|        |                    |                                                     | KGQSPLDLCPDPNLCKALAK*         | 791 | 0.62  | 7456967   |           |       |          |
|        |                    |                                                     | KGQSPLDLCPDPNLCK*ALAK         | 787 | 1     | 26019667  | 4204300   | 6.19  | 2.13E-02 |
|        |                    |                                                     | VDAAWEPSK*NTLIMGLGT<br>QGAEK  | 735 | 1     | 1597667   |           |       |          |
|        |                    |                                                     | WGK*QDGGEGHVGTVR              | 28  | 1     | 49775000  | 18184333  | 2.74  | 4.32E-02 |
| Q8IUE6 | HIST2H2A<br>B      | Histone H2A type 2-B                                | LLGGVTIAQGGVLPNIQAVL<br>LPKK* | 120 | 0.583 | 69120000  | 195746667 | 0.35  | 1.05E-03 |
| Q8IY22 | CMIP               | C-Maf-inducing protein                              | TFLSK*ILTSK                   | 74  | 1     | 43080333  | 16645000  | 2.59  | 5.82E-03 |
| Q8N3F0 | MTURN              | Maturin                                             | K*TLHEVLEK                    | 80  | 1     |           | 5784500   |       |          |
| Q8NBQ5 | HSD17B11           | Estradiol 17-beta-<br>dehydrogenase 11              | EDIYSSAK*K                    | 105 | 0.986 |           | 8450133   |       |          |
| Q8ND82 | ZNF280C            | Zinc finger protein 280C                            | GITLVCLK*CDFLADSSGLDR         | 689 | 1     | 2265067   |           |       |          |
| Q96AP7 | ESAM               | Endothelial cell-selective<br>adhesion molecule     | ALEEPANDIK*EDAIAPR            | 286 | 1     | 3897250   | 16438667  | 0.24  | 1.00E-02 |
| Q96EI5 | TCEAL4             | Transcription elongation factor A<br>protein-like 4 | EYK*EAIHDMNFSNEDMIR           | 142 | 1     | 386800000 | 186510000 | 2.07  | 1.92E-03 |
| Q96GG9 | DCUN1D1            | DCN1-like protein 1                                 | AQIPK*MEQELKEPGR              | 143 | 1     | 59123667  | 5320033   | 11.11 | 1.18E-02 |

|        |         |                                                               |                                    |     |       |          |           |      |          |
|--------|---------|---------------------------------------------------------------|------------------------------------|-----|-------|----------|-----------|------|----------|
| Q96GS6 | ABHD17A | Protein ABHD17A                                               | ELDTIEVFPTK*SAR                    | 92  | 1     | 1859200  |           |      |          |
| Q96J02 | ITCH    | E3 ubiquitin-protein ligase Itchy homolog                     | FIYGNQDLFATSQSK*EFDP<br>LGPLPPGWEK | 432 | 1     | 76975000 | 25237000  | 3.05 | 4.60E-04 |
|        |         |                                                               | VYYVDHVEK*R                        | 350 | 1     | 4031000  |           |      |          |
| Q96RG5 | IRS2    | Insulin receptor substrate 2 insertion mutant                 | GLGQSK*NLTGVYR                     | 213 | 1     | 11543867 |           |      |          |
| Q96S55 | WRNIP1  | ATPase WRNIP1                                                 | VLITENDVK*EGLQR                    | 482 | 1     | 10548233 |           |      |          |
| Q99755 | PIP5K1A | Phosphatidylinositol 4-phosphate 5-kinase type-1 alpha R      | GAIQLGITHTVGSLSTK*PE               | 103 | 1     | 36940667 | 103449667 | 0.36 | 8.36E-04 |
| Q99808 | SLC29A1 | Equilibrative nucleoside transporter 1                        | LDLISK*GEEPR                       | 255 | 1     | 12712467 |           |      |          |
| Q9BRK3 | MXRA8   | Matrix-remodeling-associated protein 8                        | SEDIQLDYK*NNILK                    | 410 | 0.996 | 2986367  |           |      |          |
| Q9BRX8 | FAM213A | OS=Homo sapiens<br>GN=FAM213A PE=1 SV=3                       | AALEYLEDIDLK*TLEKEPR               | 55  | 0.976 | 3340267  |           |      |          |
| Q9BTT0 | ANP32E  | Acidic leucine-rich nuclear phosphoprotein 32 family member E | DLSTVEALQNLK*NLK                   | 116 | 0.618 | 3933700  |           |      |          |
|        |         |                                                               | DLSTVEALQNLK*NLK                   | 113 | 0.877 | 4239800  |           |      |          |
| Q9BYM8 | RBCK1   | RanBP-type and C3HC4-type zinc finger-containing protein 1    | GPLEPGPPK*PGVPQEPGR                | 174 | 1     |          | 3173867   |      |          |
| Q9HBI6 | CYP4F11 | Phylloquinone omega-hydroxylase CYP4F11                       | DEDGK*ELSDEDIR                     | 311 | 1     | 5823667  |           |      |          |
|        |         |                                                               | SVNIMHDK*WQR                       | 177 | 1     | 3195600  |           |      |          |
|        |         |                                                               | TLPTQGIDDFLKNK*                    | 290 | 0.578 | 28006667 |           |      |          |

|        |        |                                                                    |                                 |      |       |           |           |      |          |
|--------|--------|--------------------------------------------------------------------|---------------------------------|------|-------|-----------|-----------|------|----------|
| Q9NVH2 | INTS7  | Integrator complex subunit 7                                       | SGQDYK*IPIDNMTNEMEQ<br>R        | 867  | 1     | 1429280   | 12624667  | 0.11 | 9.62E-03 |
| Q9NX12 | ITM2B  | Integral membrane protein 2B                                       | VTFNSALAQK*EAK                  | 13   | 1     | 70378333  | 27793133  | 2.53 | 4.63E-02 |
| Q9NX57 | RAB20  | Ras-related protein Rab-20                                         | IVLLGDMNVGK*TSLLQR              | 18   | 1     | 2770633   |           |      |          |
| Q9NZA1 | CLIC5  | Chloride intracellular channel protein 5                           | LHVVK*IVAK                      | 355  | 1     | 13495267  | 81066667  | 0.17 | 3.88E-03 |
| Q9NZM1 | MYOF   | Myoferlin                                                          | LDMIPDLK*AMNPLK                 | 1928 | 0.997 | 2661000   | 7307567   | 0.36 | 6.91E-03 |
| Q9P225 | DNAH2  | Dynein heavy chain 2, axonemal                                     | FIEPPVLNMK*SVLEDSTPR            | 3825 | 1     | 3902967   |           |      |          |
| Q9UBI6 | GNG12  | Guanine nucleotide-binding protein G(I)/G(S)/G(O) subunit gamma 12 | VSK*ASADLMSYCEEHAR              | 34   | 1     |           | 5240967   |      |          |
| Q9UKJ5 | CHIC2  | Cysteine-rich hydrophobic domain-containing protein 2              | SIEK*LLEWENNR                   | 117  | 1     | 159696667 | 44920333  | 3.56 | 2.07E-03 |
| Q9UM47 | NOTCH3 | Neurogenic locus notch homolog protein 3                           | GESLMGEVATDWMDECP<br>EAK*R      | 1730 | 1     | 2163600   |           |      |          |
| Q9Y277 | VDAC3  | Voltage-dependent anion-selective channel protein 3                | CNTPTYCDLGK*AAK                 | 12   | 0.976 | 2763350   |           |      |          |
| Q9Y3I0 | RTCB   | tRNA-splicing ligase RtcB homolog                                  | GGGVGGFLPAMK*QIGNVA<br>ALPGIVHR | 67   | 1     | 4917467   |           |      |          |
| Q9Y4R8 | TELO2  | Telomere length regulation protein TEL2 homolog                    | ETLLGK*VVALPDHLGNR              | 159  | 1     | 4636233   |           |      |          |
| U3PXP0 | HBA2   | Alpha globin chain                                                 | AAWGK*VGAHAGEYGAEAL<br>LER      | 17   | 1     | 3086200   | 60241333  | 0.05 | 2.86E-03 |
| U6FSN9 | MPRIP  | Tyrosine-protein kinase receptor                                   | GWLTK*QYEDGQWK                  | 396  | 1     | 39000333  | 101817667 | 0.38 | 4.48E-03 |
| U6FVB0 | CD74   | Tyrosine-protein kinase receptor                                   | RPGAPESK*CSR                    | 43   | 1     | 13839667  | 40798000  | 0.34 | 2.81E-02 |

|        |       |                                              |                 |    |   |          |          |      |          |
|--------|-------|----------------------------------------------|-----------------|----|---|----------|----------|------|----------|
| V9HW25 | TPM2b | Epididymis secretory protein Li<br>273       | CK*QLEEEQQALQK  | 37 | 1 | 12962433 | 49697000 | 0.26 | 2.15E-02 |
| X6RAL5 | SAP18 | Histone deacetylase complex<br>subunit SAP18 | ELTSLVK*EVYPEAR | 93 | 1 | 14797667 | 5697550  | 2.60 | 6.01E-03 |

---
