# Supplementary material for: Label-free quantitative identification of abnormally ubiquitinated proteins as useful biomarkers for human lung squamous cell carcinomas
Source: PubMed Central journal article supplement (PMC7028901; doi:10.1007/s13167-019-00197-8), 2020-01-04
Supplement: 13167_2019_197_MOESM9_ESM.pdf [file 13167_2019_197_MOESM9_ESM.pdf]

**Supplemental Table 7. The biological process (BP) of co-expressed genes of ABCC1.**

| GO_ID      | GO Term_Description                                     | PValue   | Genes                                                                                                                                                                      | FDR      |
|------------|---------------------------------------------------------|----------|----------------------------------------------------------------------------------------------------------------------------------------------------------------------------|----------|
| GO_0055114 | oxidation-reduction process                             | 6.09E-09 | ME1, PTGR1, PGD, UGDH, CYP26A1, OSGIN1, CYP4F11, ADH7, ALDH3A2, ALDH3A1, AKR1C3, GPX2, GSR, AKR1C2, PYCR2, G6PD, MMACHC, AKR1B10, RRM1, TXN, CYP4F3, TXNRD1, SRXN1, AKR1C1 | 3.48E-06 |
| GO_0008152 | metabolic process                                       | 3.84E-06 | UGT1A7, GSTM2, UGT1A6, UGT1A9, GSTM4, DIP2B, CES1, UGT1A3, UGT1A4, UGT1A1, ACSF2                                                                                           | 6.26E-04 |
| GO_1904224 | negative regulation of glucuronosyltransferase activity | 3.55E-09 | UGT1A7, UGT1A6, UGT1A9, UGT1A3, UGT1A4, UGT1A1                                                                                                                             | 4.06E-06 |
| GO_2001030 | negative regulation of cellular glucuronidation         | 3.55E-09 | UGT1A7, UGT1A6, UGT1A9, UGT1A3, UGT1A4, UGT1A1                                                                                                                             | 4.06E-06 |
| GO_0045922 | negative regulation of fatty acid metabolic process     | 7.94E-09 | UGT1A7, UGT1A6, UGT1A9, UGT1A3, UGT1A4, UGT1A1                                                                                                                             | 3.02E-06 |
| GO_0052697 | xenobiotic glucuronidation                              | 7.94E-09 | UGT1A7, UGT1A6, UGT1A9, UGT1A3, UGT1A4, UGT1A1                                                                                                                             | 3.02E-06 |
| GO_0042573 | retinoic acid metabolic process                         | 1.21E-07 | UGT1A7, UGT1A9, UGT1A3, CYP26A1, ADH7, UGT1A1                                                                                                                              | 3.47E-05 |
| GO_0052695 | cellular glucuronidation                                | 2.61E-07 | UGT1A7, UGT1A6, UGT1A9, UGT1A3, UGT1A4, UGT1A1                                                                                                                             | 5.96E-05 |
| GO_0052696 | flavonoid glucuronidation                               | 1.50E-06 | UGT1A7, UGT1A6, UGT1A9, UGT1A3, UGT1A4, UGT1A1                                                                                                                             | 2.86E-04 |
| GO_0034599 | cellular response to oxidative stress                   | 3.18E-04 | PYCR2, G6PD, ATP2A2, MGMT, NFE2L2, SRXN1                                                                                                                                   | 3.57E-02 |
| GO_0098869 | cellular oxidant detoxification                         | 4.83E-04 | GPX2, GSTM2, GSR, TXN, TXNRD1, SRXN1                                                                                                                                       | 4.89E-02 |
| GO_0009813 | flavonoid biosynthetic process                          | 3.09E-05 | UGT1A7, UGT1A6, UGT1A3, UGT1A4, UGT1A1                                                                                                                                     | 4.40E-03 |
| GO_0044597 | daunorubicin metabolic process                          | 4.26E-05 | AKR1C3, AKR1C2, AKR1B10, AKR1C1                                                                                                                                            | 5.39E-03 |
| GO_0044598 | doxorubicin metabolic process                           | 4.26E-05 | AKR1C3, AKR1C2, AKR1B10, AKR1C1                                                                                                                                            | 5.39E-03 |
| GO_0071395 | cellular response to jasmonic acid stimulus             | 5.08E-04 | AKR1C3, AKR1C2, AKR1C1                                                                                                                                                     | 4.72E-02 |
