# Supplementary material for: Label-free quantitative identification of abnormally ubiquitinated proteins as useful biomarkers for human lung squamous cell carcinomas
Source: PubMed Central journal article supplement (PMC7028901; doi:10.1007/s13167-019-00197-8), 2020-01-04
Supplement: 13167_2019_197_MOESM11_ESM.pdf [file 13167_2019_197_MOESM11_ESM.pdf]

**Supplemental Table 9. GSEA result of ABCC1 based on TCGA database.**

| KEGG Term                                                 | ES       | NES      | NOM p va | FDR q val | LEADING EDGE                   |
|-----------------------------------------------------------|----------|----------|----------|-----------|--------------------------------|
| KEGG_GLUTATHIONE_METABOLISM                               | 6.52E-01 | 1.93E+00 | 0.00E+00 | 2.12E-01  | tags=28%, list=5%, signal=30%  |
| KEGG_GLYCOSYLPHOSPHATIDYLINOSITOL_GPI_ANCHOR_BIOSYNTHESIS | 5.67E-01 | 1.93E+00 | 1.93E-03 | 1.09E-01  | tags=32%, list=15%, signal=37% |
| KEGG_PORPHYRIN_AND_CHLOROPHYLL_METABOLISM                 | 6.58E-01 | 1.71E+00 | 1.37E-02 | 4.12E-01  | tags=20%, list=1%, signal=20%  |
| KEGG_METABOLISM_OF_XENOBIOTICS_BY_CYTOCHROME_P450         | 6.76E-01 | 1.64E+00 | 1.62E-02 | 5.31E-01  | tags=35%, list=6%, signal=37%  |
| KEGG_STARCH_AND_SUCROSE_METABOLISM                        | 5.66E-01 | 1.57E+00 | 1.83E-02 | 4.82E-01  | tags=27%, list=7%, signal=29%  |
| KEGG_PROGESTERONE_MEDIATED_OOCYTE_MATURATION              | 3.96E-01 | 1.57E+00 | 1.83E-02 | 4.29E-01  | tags=39%, list=22%, signal=50% |
| KEGG_PENTOSE_AND_GLUCURONATE_INTERCONVERSIONS             | 7.28E-01 | 1.62E+00 | 2.39E-02 | 4.81E-01  | tags=33%, list=2%, signal=34%  |
| KEGG_ASCORBATE_AND_ALDARATE_METABOLISM                    | 7.19E-01 | 1.56E+00 | 3.32E-02 | 4.13E-01  | tags=46%, list=6%, signal=48%  |
| KEGG_BASAL_CELL_CARCINOMA                                 | 5.46E-01 | 1.47E+00 | 4.85E-02 | 5.77E-01  | tags=31%, list=6%, signal=33%  |
| KEGG_STEROID_HORMONE_BIOSYNTHESIS                         | 5.57E-01 | 1.42E+00 | 4.89E-02 | 5.40E-01  | tags=20%, list=1%, signal=20%  |
| KEGG_GLYCOSAMINOGLYCAN_BIOSYNTHESIS_KERATAN_SULFATE       | 6.24E-01 | 1.59E+00 | 4.99E-02 | 5.04E-01  | tags=33%, list=7%, signal=36%  |
